1 **Puf4 Mediates Post-transcriptional Regulation of Caspofungin Resistance in**

2 ***Cryptococcus neoformans***

3

4 Murat C. Kalem<sup>a</sup>; Harini Subbiah<sup>a</sup>; Jay Leipheimer<sup>a</sup>; Virginia E. Glazier<sup>b</sup>; John C. Panepinto<sup>a\*</sup>

5 <sup>a</sup> Department of Microbiology and Immunology, Witebsky Center for Microbial Pathogenesis and

6 Immunology, Jacobs School of Medicine and Biomedical Sciences, University at Buffalo, SUNY,

7 Buffalo, NY 14203, USA.

8 <sup>b</sup> Department of Biology, Niagara University, Niagara, NY, 14109, USA.

9 \* e-mail: [jcp25@buffalo.edu](mailto:jcp25@buffalo.edu)

10

11

12

13

14

15

16

17

18

19

20

21

22

23

## 24 **Abstract**

25 Echinocandins have been on the market for 20 years, yet they are the newest class of  
26 antifungal drugs. The human fungal pathogen *Cryptococcus neoformans* is intrinsically resistant  
27 to the echinocandin antifungal drug caspofungin, which targets the  $\beta$ -1,3-glucan synthase  
28 encoded by the *FKS1*. Analysis of a *C. neoformans puf4* $\Delta$  mutant, lacking the pumilio/FBF RNA  
29 binding protein family member Puf4, revealed exacerbated caspofungin resistance. In contrast,  
30 overexpression of *PUF4* resulted in caspofungin sensitivity. The *FKS1* mRNA contains three  
31 Puf4-binding elements (PBEs) in its 5' untranslated region. Puf4 binds with specificity to this  
32 region of the *FKS1*. The *FKS1* mRNA was destabilized in the *puf4* $\Delta$  mutant, and the abundance  
33 of the *FKS1* mRNA was reduced compared to wild type, suggesting that Puf4 is a positive  
34 regulator *FKS1* mRNA stability. In addition to *FKS1*, the abundance of additional cell wall  
35 biosynthesis genes, including chitin synthases (*CHS3*, *CHS4*, *CHS6*) and deacetylases (*CDA1*,  
36 *CDA2*, *CDA3*) as well as a  $\beta$ -1,6-glucan synthase gene (*SKN1*) was regulated by Puf4 during a  
37 caspofungin time course. The use of fluorescent dyes to quantify cell wall components revealed  
38 that the *puf4* $\Delta$  mutant had increased chitin content, suggesting a cell wall composition that is  
39 less reliant on  $\beta$ -1,3-glucan. Overall, our findings suggest a mechanism by which caspofungin  
40 resistance, and more broadly, cell wall biogenesis, is regulated post-transcriptionally by Puf4.

41

## 42 **Importance**

43 *Cryptococcus neoformans* is an environmental fungus that causes pulmonary and central  
44 nervous system infections. It is also responsible for 15% of AIDS-related deaths. A major  
45 contributor to the high morbidity and mortality statistics is the lack of safe and effective  
46 antifungal therapies, especially in resource-poor settings. Yet, antifungal drug development has  
47 stalled in the pharmaceutical industry. Therefore, it is of importance to understand the

48 mechanism by which *C. neoformans* is resistant to caspofungin in order to design adjunctive  
49 therapies to potentiate its activity toward this important pathogen.

50

## 51 **Introduction**

52 Invasive deep mycoses primarily impact immunocompromised populations causing high rates of  
53 morbidity and mortality (1, 2). The pathogenic fungus *Cryptococcus neoformans* is the causative  
54 agent of fatal meningitis most often in patients with defects in cell mediated immunity, including  
55 transplant recipients and those living with HIV/AIDS (3–6). *C. neoformans* is responsible of the  
56 15% of AIDS-related deaths (6). Treatment of cryptococcosis is difficult and therapeutic options  
57 are limited. Even the best combination treatment using Amphotericin B with 5-fluorocytosine (5-  
58 FC) is not well tolerated, and 5-FC is often unavailable in resource-poor areas (7). Some of the  
59 largest clinical challenges to invasive fungal infections are poor efficacy of the drugs, emerging  
60 resistance issues, narrow selection and availability of antifungals especially in the areas where  
61 needed the most (8, 9).

62

63 Another antifungal agent, fluconazole, is largely ineffective as the first-line therapy since  
64 it lacks effective fungicidal activity against *C. neoformans in vivo* even at high concentrations  
65 and presents resistance issues (10, 11). Echinocandins (such as caspofungin, micafungin and  
66 anidulafungin) are the latest class of antifungal drugs approved by the Food and Drug  
67 Administration (FDA) that target cell wall biosynthesis. The echinocandins are ineffective  
68 against *C. neoformans* due to a high level of intrinsic resistance (12). Echinocandins  
69 specifically target the  $\beta$ -1,3-glucan synthase encoded by *FKS1*, and *C. neoformans* *Fks1* is  
70 sensitive to inhibition by the echinocandins, suggesting that the mechanism of intrinsic  
71 resistance is not related to biochemical differences in the target itself (13). In other pathogenic  
72 fungi, such as *Aspergillus* and *Candida* species, resistance to caspofungin is manifested due to  
73 mutations in *FKS1*, but this is not observed in *Cryptococcus* (14, 15). Another mechanism that is

74 discussed regarding caspofungin resistance in pathogenic fungi involves the cell wall  
75 remodeling and integrity pathways (14–16). It has been shown that increased cell wall chitin  
76 content contributes to caspofungin resistance (17, 18). Additionally, a defect in intracellular drug  
77 concentration maintenance due to drug influx and efflux imbalance has been proposed to be a  
78 potential mechanism to explain the intrinsic resistance phenomenon (19, 20). Discovering and  
79 targeting the regulatory components behind the pathways involved in the intrinsic resistance  
80 may result in a combination therapy that potentiates the antifungal activity of caspofungin  
81 toward *C. neoformans*.

82

83 Calcineurin signaling plays a distinct role in intrinsic caspofungin resistance (21, 22).  
84 Caspofungin synergizes with the calcineurin inhibitors FK506 and Cyclosporin A (23). Both the  
85 A and B subunits of Calcineurin regulate tolerance to caspofungin (19). Crz1, the transcription  
86 factor that is activated through dephosphorylation by calcineurin, translocates to the nucleus  
87 following treatment with caspofungin, yet the *crz1Δ* mutant exhibits wild type sensitivity to the  
88 drug, suggesting caspofungin resistance is Crz1-independent. (19). Calcineurin functions at the  
89 intersection of multiple signaling pathways and interacts with a diversity of proteins involved in  
90 calcium signaling, RNA processing, protein synthesis and vesicular trafficking among others  
91 (24, 25). Since caspofungin resistance is calcineurin-dependent, yet Crz1-independent, RNA  
92 processing targets of calcineurin that may be involved in resistance to caspofungin through  
93 post-transcriptional modulation of gene expression are especially of interest. Tight control of not  
94 only transcriptional but also post-transcriptional gene regulatory networks in drug resistance  
95 phenotypes is underappreciated in fungal pathogens, yet may represent targets for adjunctive  
96 therapies to improve the efficacy of drugs.

97

98 One of the targets of calcineurin involved in RNA processing is a pumilio-domain and  
99 FBF (PUF) domain-containing RNA-binding protein - Puf4 (24). *C. neoformans* Puf4 is

100 homologous to the *Saccharomyces cerevisiae* paralogs Puf4 and Mpt5 (26). Our previous work  
101 demonstrated that *C. neoformans* Puf4 recognizes the Mpt5 binding element in its mRNA  
102 targets (27). It has been hypothesized that Puf4 may play a role in the regulation of cell wall  
103 biosynthesis since the *puf4* $\Delta$  mutant is resistant to lysing enzymes, is temperature sensitive at  
104 both 37°C and 39°C, and is sensitive to Congo red (28). Our group has previously shown that  
105 Puf4 regulates endoplasmic reticulum (ER)-stress through controlling the splicing of a major ER-  
106 stress related transcript, *HXL1*, and plays a role in the unfolded protein response pathway of *C.*  
107 *neoformans*. Puf4 also contributes to virulence, as the *puf4* $\Delta$  mutant has attenuated virulence  
108 compared to wild type in an intravenous murine competition model of cryptococcosis (27).

109

110 In this study we demonstrated that Puf4 contributes to the intrinsic caspofungin  
111 resistance of *C. neoformans* through post-transcriptional regulation of the mRNA encoding the  
112 drug target, Fks1. Puf4 also regulated a number of the cell wall biosynthesis-related mRNAs.  
113 This regulation is primarily at the level of mRNA stability and has functional consequences in  
114 maintaining cell wall composition.

115

## 116 **Results**

### 117 **The *puf4* $\Delta$ mutant is resistant to caspofungin.**

118 Our previous work has implicated the pumilio family RNA binding protein Puf4 in the regulation of  
119 ER stress in *C. neoformans* (27). Puf4 is an effector of calcineurin signaling, a pathway known to  
120 regulate thermotolerance and cell integrity (24, 28). Given the connection of Puf4 to cell integrity  
121 signaling, we assessed the sensitivity of *puf4* $\Delta$  mutant to the cell wall perturbing drug caspofungin.  
122 We measured caspofungin sensitivity by spot plate analyses, and found that the *puf4* $\Delta$  mutant is  
123 resistant to caspofungin above the published minimum inhibitory concentration of 16  $\mu$ g/ml (Fig.  
124 1A). This result suggests that Puf4 is a negative regulator of caspofungin resistance in *C.*  
125 *neoformans*, since its absence presents a hyper-resistant phenotype. When Puf4 was

126 overexpressed with a FLAG-tag (3-copies determined by Southern blot analysis), the hyper-  
127 resistance was not only suppressed, but the strain was more sensitive to caspofungin. Single-  
128 copy FLAG-Puf4 complementation of the *puf4*Δ mutant restored a wild type resistance phenotype  
129 (Fig. 1A). In addition to the spot plate analyses, growth analysis using liquid cultures in a kinetic  
130 plate reader assay in the presence of 8 μg/ml caspofungin showed similar trends to the  
131 phenotypes observed in spot plates (Fig. 1B). Growth was not permissible in the presence of 16  
132 μg/ml caspofungin in liquid culture for both wild type and the mutant cells suggesting that the  
133 action of caspofungin may be influenced by the environmental constraints in different culture  
134 conditions (data not shown).

135

#### 136 **Puf4 directly binds and stabilizes the *FKS1* mRNA.**

137 The target of caspofungin, β-1,3-glucan synthase, is encoded by the *FKS1* gene. We searched  
138 the *FKS1* mRNA sequence for a potential Puf4 binding element. Our previous work suggests  
139 that the Puf4 binding element in *C. neoformans* is homologous to that of *S. cerevisiae* Mpt5,  
140 including the invariant initiating UGUGA followed by a four-nucleotide spacer sequence and  
141 terminating UA. We found that the *FKS1* mRNA contains two Puf4 binding elements in its 5'  
142 UTR (Fig 2A). To determine if Puf4 can directly interact with its consensus element(s) in the  
143 5'UTR of the *FKS1* mRNA we performed electrophoretic mobility shift assay (EMSA). We  
144 synthesized a 50-base long fluorescently labeled (TYE705 infrared label) RNA oligonucleotide  
145 that span the *FKS1* 5' UTR containing the Puf4-binding elements (Table 2). Incubation of the  
146 fluorescent oligonucleotide with the wild type cell lysate resulted a shift that was competed with  
147 the unlabeled oligonucleotide. A mutant competitor, in which the **UGUANNNUA** motif was  
148 replaced by adenines, was unable to compete for binding to the wild type fluorescent  
149 oligonucleotide. This suggests that Puf4 binds to the *FKS1* mRNA through sequence-specific  
150 recognition of the Puf4 binding elements in the 5' UTR (Fig. 2B). Incubation of the fluorescent  
151 oligonucleotide with the *puf4*Δ mutant lysate has the absence a shift that was observed with the

152 Puf4-FLAG cell lysate (Fig 2B, arrow). Because, we detected an interaction between Puf4 and  
153 the 5'UTR sequence of *FKS1*, we went on to investigate if loss of Puf4 would alter the  
154 abundance or stability of *FKS1* mRNA. *FKS1* mRNA abundance in mid-log grown cultures of  
155 *puf4* $\Delta$  cells were decreased 20% compared to wild type grown in parallel (Fig. 2C). PUF  
156 proteins are known mRNA stability regulators, and so we asked if the reduction in *FKS1* mRNA  
157 in the *puf4* $\Delta$  mutant was due to destabilization. We performed an mRNA stability time-course  
158 following transcription shut-off and found that the *FKS1* mRNA was destabilized in the absence  
159 of Puf4 compared to the wild type (Fig 2D).

160

#### 161 **Puf4 protein expression is decreased following caspofungin treatment.**

162 Because Puf4 is a regulator of the *FKS1* mRNA, we asked if inhibition of Fks1 by caspofungin  
163 treatment would alter the abundance of *PUF4* mRNA or Puf4 protein. First, we performed a  
164 caspofungin time course in which we treated wild type cultures grown to mid-log phase with 16  
165  $\mu$ g/ml caspofungin for 60 minutes and collected cells every 15 minutes. We quantified the *PUF4*  
166 transcript levels, and found out that the *PUF4* transcript levels are unchanged throughout time-  
167 course (Fig 3A). Then we utilized the Puf4-FLAG strain to investigate if Puf4 protein levels are  
168 changed following treatment with caspofungin using immunoblotting. We found that Puf4 protein  
169 levels are drastically decreased following treatment with caspofungin (Fig 3B and 3C). Since the  
170 absence of Puf4 causes a hyper-resistant phenotype (as shown in Fig. 1A), we speculate that  
171 the downregulation of Puf4 protein levels may be a contributing event to the intrinsic resistance.

172

#### 173 **Puf4-dependent *FKS1* regulation correlates with reduced $\beta$ -1,3-glucan staining in the *puf4* $\Delta$ 174 mutant.**

175 We next investigated the *FKS1* mRNA levels following treatment with caspofungin to determine  
176 if inhibition of the enzyme activates a feedback mechanism to upregulate expression of *FKS1*.

177 The *FKS1* mRNA abundance is upregulated in wild type cells at 45 minutes post-caspofungin  
178 treatment compared to 30 minutes (Fig 4A). Conversely, the *puf4* $\Delta$  mutant cells have  
179 decreased levels of *FKS1* at 30 minutes post-caspofungin treatment, which is restored to the  
180 basal levels at later time points (Fig. 4A). These different trends in transcript abundance  
181 following caspofungin treatment may suggest that the cell wall  $\beta$ -1,3-glucan levels may differ  
182 between wild type and the *puf4* $\Delta$  cells.

183

184 To investigate the functional consequences of the trends we observed at the transcript  
185 level, we utilized aniline blue staining to investigate the  $\beta$ -1,3-glucan levels in the cell wall of the  
186 wild type and the *puf4* $\Delta$  cells. Aniline blue specifically binds to  $\beta$ -1,3-glucan (29). Following  
187 growth to mid-log phase, both strains were treated with caspofungin for 60 minutes and stained  
188 with aniline blue. Fluorescence microscopy revealed that aniline blue staining mainly localized  
189 to the cell wall in the mid-logarithmic stage cells. In addition to the cell wall staining pattern,  
190 staining pattern of the caspofungin treated cells also contained an intracellular punctate pattern  
191 (Fig. 4B). Quantification of the microscopy images showed that the *puf4* $\Delta$  cells had 30% less  $\beta$ -  
192 1,3-glucan compared to the wild type cells both at the mid-logarithmic stage and following  
193 treatment with caspofungin (Fig. 4C). We concluded that the post-transcriptional regulation of  
194 the *FKS1* mRNA by Puf4 directly affects cellular  $\beta$ -1,3-glucan levels.

195

#### 196 **Deletion of *PUF4* leads to dysregulation of cell wall biosynthesis genes.**

197 A recent study revealed that multiple cell wall genes are influenced by caspofungin treatment  
198 (19). We assessed the same panel of mRNAs for the presence of a putative Puf4 binding  
199 element, and found that several caspofungin-sensitive genes contain Puf4 binding elements  
200 (Table 1). These include genes that encode chitin synthases, chitin deacetylases,  $\alpha$ -glucan and  
201  $\beta$ -glucan synthases.



202

203 We next asked if the caspofungin-responsiveness of these genes was dependent on  
204 Puf4. Following growth to the mid-log stage, we challenged both wild type and the *puf4* $\Delta$  cells  
205 with 16  $\mu$ g/ml caspofungin over a 60-minute time course and investigated the changes in the  
206 transcript abundance of genes involved in cell wall biosynthesis. We found that *CHS3* (Chitin  
207 Synthase 3) is downregulated following caspofungin treatment in the *puf4* $\Delta$  cells compared to  
208 wild type (Fig 5A). Conversely, *CHS4* and *CHS6* are found to be upregulated in the *puf4* $\Delta$   
209 mutant compared to wild type (Fig 5B and 5C). Elevated cell wall chitin content is shown to  
210 reduce susceptibility to caspofungin in *Candida* species (18). Therefore, upregulation of chitin  
211 synthase genes in the *puf4* $\Delta$  mutant may also contribute to the resistance phenotype in  
212 *Cryptococcus*. The synthesis of chitosan from chitin is catalyzed by the chitin deacetylases and  
213 chitosan is necessary for the integrity of the cell wall (30). During the caspofungin time course,  
214 we found out that *CDA1* (chitin deacetylase 1) is upregulated in the *puf4* $\Delta$  mutant. On the  
215 contrary, *CDA2* and *CDA3* were found to be downregulated in the *puf4* $\Delta$  mutant (Fig 5D-F). The  
216 *CDA3* is the only chitin deacetylase gene that contain a PBE (Table 1). Of note, *Cda1* is the  
217 major chitin deacetylase and the only chitin deacetylase that is necessary for virulence (31).  
218

219 Lastly, we looked at the regulation of  $\alpha$ -glucan and  $\beta$ -glucan genes during the  
220 caspofungin time-course. We have found that *AGS1* ( $\alpha$ -glucan synthase 1) was present at a  
221 slightly higher abundance in the *puf4* $\Delta$  compared to the wild type at the basal levels. Which then  
222 decreased significantly at the 30 minutes time point. The *AGS1* contains a PBE at its 5'UTR,  
223 and may be a Puf4 target (Table 1). The  $\beta$ -1,6-glucan synthase genes *KRE6* and *SKN1* showed  
224 opposite trends. Both wild type and the *puf4* $\Delta$  cells had comparable levels of *KRE6* at t=0  
225 minutes, yet the *puf4* $\Delta$  cells had a significantly decreasing trend of *KRE6* abundance during the  
226 caspofungin time-course. Another  $\beta$ -1,6-glucan synthase gene *SKN1* was upregulated in the

227 *puf4*Δ compared to wild type and remained upregulated throughout the 60 minutes (Fig 5G-I).  
228 The PBE element that is present in the *SKN1* 3' UTR compared to *KRE6*, which does not have  
229 a PBE, may explain the opposite trends in post-transcriptional gene regulation.

230

231 Our quantitative analysis of the mRNAs involved in cell wall biosynthesis showed that  
232 Puf4 plays a regulatory role in the fate of these mRNAs and modulate their abundances during  
233 caspofungin treatment.

234

### 235 **Puf4 stabilizes cell wall biosynthesis genes involved in chitin and α-glucan synthesis.**

236 To gain more mechanistic insight on how Puf4 may control the cell wall biosynthesis related  
237 transcript abundances, we investigated the mRNA stability of the same transcripts. mRNA  
238 stability is a crucial step in transcriptome remodeling to adapt to various environmental and  
239 compound stressors (32). Therefore, we hypothesized that Puf4 may modulate cell wall  
240 biosynthesis genes post-transcriptionally at the mRNA stability level.

241

242 We found that *CHS3* and *CHS4* were destabilized to a great degree in the *puf4*Δ mutant,  
243 whereas *CDA3*, *AGS1* and *CDA1* exhibited a slight reduction in stability in the absence of Puf4.  
244 Unlike other genes we investigated, *CDA1* does not contain a PBE and was included as a  
245 negative control. Even though we expected *CDA1* stability to be like wild type, it too was slightly  
246 destabilized (Fig. 6). Our results show that Puf4-mediated post-transcriptional gene regulation in  
247 mRNA stability may be crucial for cell wall remodeling that contributes to the caspofungin  
248 resistance.

249

250 **Caspofungin treatment leads to increased cell wall chitin which is exacerbated in the**  
251 ***puf4*Δ mutant.**

252 Since we have shown that Puf4 regulates cell wall biosynthesis related transcript abundances  
253 and their mRNA stability, we further investigated the functional consequences of this Puf4 loss  
254 by assessing cell wall chitin and chitooligomer content using calcofluor and wheat germ  
255 agglutinin staining, respectively. Microscopy (Fig 7A) and flow cytometry analysis (Fig 7B-C) of  
256 the chitin content using calcofluor dye showed that the cell wall chitin content increases  
257 following caspofungin treatment in both wild type and the *puf4* $\Delta$  cells. Importantly, the *puf4* $\Delta$   
258 cells had significantly more chitin following caspofungin treatment compared to that of wild type  
259 cells. In other pathogenic fungi such as *Candida* species and *Aspergillus fumigatus*, increased  
260 chitin content is protective against caspofungin (17, 18).

261

262 Microbial cultures show molecular and phenotypical heterogeneity that may be important  
263 within the scope of antimicrobial resistance (33). Histogram graphs of the calcofluor staining  
264 showed that the increase in chitin content is at a sub-population level (Fig 7B). While the majority  
265 of the *puf4* $\Delta$  cell population shifted to a high chitin phenotype, wild type cells showed a more  
266 heterogeneous population. Lastly, we looked at the exposed chitooligomers as another form of  
267 chitin-derived structure, and saw a modest increase compared in the *puf4* $\Delta$  cells compared to the  
268 wild type.

269

270 In this study, we have demonstrated that the caspofungin resistance of *C. neoformans* is  
271 regulated at the post-transcriptional level through the direct interaction of the mRNA encoding its  
272 target, *FKS1*, as well as through the regulation of multiple genes that regulate cell wall  
273 composition. Post-transcriptional regulation of cell wall remodeling genes by Puf4 has functional  
274 consequences, as the absence of Puf4 results to massive remodeling of the *C. neoformans* cell  
275 wall components. Future work will investigate the effect of Puf4 on the translation of these target  
276 mRNAs, as well as the mechanism by which Puf4 itself is regulated.

277

278 **Discussion**

279 The search for novel antifungal therapies is an ongoing battle in medical mycology, especially  
280 with the growing number of fungal outbreaks and emerging drug resistance issues (33, 34). The  
281 latest class of antifungals approved by the FDA are the echinocandins, and *Cryptococcus* is  
282 intrinsically resistant to this class of antifungals (9, 14, 15, 36). Even though it is crucial to  
283 design new therapies, it is also imperative to understand the resistance mechanisms to the  
284 existing antifungals to avoid similar scenarios and to design adjunctive therapies to remedy the  
285 current resistance issues. In this study, we elucidated the role of post-transcriptional gene  
286 regulation in the molecular mechanism of action behind the caspofungin resistance. We  
287 discovered that Puf4, a Pumilio domain-containing RNA binding protein, plays a role in the  
288 resistance phenotype by stabilizing the mRNAs encoding cell wall biosynthesis genes post-  
289 transcriptionally. The functional consequence of this interaction is a change in cell wall  
290 composition to a state that is more favorable during caspofungin challenge (Fig. 8). The intrinsic  
291 resistance of *C. neoformans* to caspofungin involves multiple signaling pathways (13, 35). For  
292 the first time, we have implicated post-transcriptional regulation of cell wall biosynthesis  
293 mRNAs, including the mRNA encoding the target of caspofungin, in this intrinsic resistance.

294

295 PUF proteins, in addition to their interactions with other signaling proteins, alters mRNA  
296 function, and this is often secondary to the translational repression or the inhibition of mRNA  
297 decay (37, 38). Binding by Puf4 and other PUF proteins orchestrate mRNA fate-determining  
298 processes including stability, splicing, localization and translatability (39, 40). For example, *S.*  
299 *cerevisiae* Puf4p stabilizes the transcripts involved in rRNA processing, and deletion of *PUF4* in  
300 *S. cerevisiae* causes defects in translation. Additionally, Puf4p plays a role in the recruitment of  
301 mRNAs to the translational machinery (41). In *C. neoformans*, Puf4 appears to play both  
302 positive and negative regulatory roles. Puf4 is a positive regulator of the unconventional splicing  
303 of the ER-stress transcription factor *HXL1*. In contrast, Puf4 is a negative regulator of the *ALG7*

304 mRNA, which is stabilized in the *puf4* $\Delta$  mutant (27). Interestingly, the Puf4 elements in the *HXL1*  
305 mRNA, like *FKS1*, are in the 5' UTR, which may suggest that 5' UTR Puf4-binding elements  
306 exert positive regulatory activity. Stabilization of the 5' UTR Puf4 binding element containing  
307 *CHS3* and *AGS1* in the absence of Puf4 support this claim (Table 1 and Fig. 6). Caspofungin  
308 challenge likely requires a reprogramming of gene regulatory networks for adaptation, and Puf4  
309 and other related RNA-binding proteins may be involved in transforming the translating mRNA  
310 pool to best respond to the pharmacologically induced stress by caspofungin.

311

312 Cell wall maintenance and perturbations in response to drug induced stress have a  
313 broad appreciation by the medical mycology (42). For example, the *mar1* $\Delta$  mutant exhibits a  
314 defect in intracellular trafficking of cell wall synthases and therefore exhibits a cell wall  
315 composition that contains elevated exposed chitin and decreased glucan levels. These changes  
316 in the cell wall composition and exposure of different carbohydrates play meaningful roles in the  
317 immune recognition by the host and activate various signaling events in the host system (43).  
318 Another example is the enhanced recognition of the *ccr4* $\Delta$  mutant by alveolar macrophages due  
319 to increased unmasking of the  $\beta$ -1,3-glucan (44). The importance of Ccr4, an mRNA  
320 deadenylase, in glucan masking is further evidence that post-transcriptional processes are  
321 essential for adaptation to a number of stressors, including caspofungin treatment. In this study,  
322 we show that Puf4 is a major regulator of cell wall biogenesis. We report that cell wall  
323 biosynthesis genes showed different trends of expression in the *puf4* $\Delta$  compared to wild type in  
324 caspofungin time-course experiments. We have also shown that *FKS1*, *CHS3* and *CHS4*  
325 mRNAs were destabilized in the absence of Puf4. This regulation of certain cell wall biogenesis  
326 genes by Puf4 may be a necessary component of cell wall homeostasis under normal growth  
327 conditions as well as facilitating rapid changes in cell wall gene expression during adaptation to  
328 drug-induced stress. We have predicted that transcripts that have the PBE would have

329 enhanced decay in the *puf4* $\Delta$  mutant yet this was not true for all transcripts that carried PBEs.  
330 We investigated the stability of *CDA1* as a transcript that did not contain a PBE, yet we  
331 observed a modest change in the mRNA stability. In that regard, it must be noted that other  
332 RNA-binding proteins may play meaningful regulatory roles in conjunction with Puf4.  
333 Additionally, the impact of Puf4 on its targets may be unique and this may be due to the location  
334 of the PBE within the transcript, whether it is in the 3' or 5' UTR, introns or exons, and may yield  
335 to variations in which Puf4 regulates transcript fate. Moving forward, screening additional RNA-  
336 binding proteins to understand the post-transcriptional regulatory network controlling cell wall  
337 dynamics, as well as investigating the regulatory connections with the cell integrity pathway and  
338 calcineurin signaling pathway will elucidate further the response of *C. neoformans* to  
339 caspofungin that mitigate its toxicity and promote intrinsic resistance.

340

341         The complex cell wall structure of *C. neoformans* protects the cell from the extracellular  
342 stressors including antifungals. A sturdier cell wall can also serve as a less permeable barrier to  
343 antifungal drugs, making them less effective (45). We found that following treatment with  
344 caspofungin wild type cells had an increase in the cell wall chitin. This increase was observed at  
345 the sub-population level. This was an intriguing finding since sub-population impact of  
346 antifungals are a neglected area of study, yet these heterogeneously resistant or tolerant  
347 populations may play important roles in antifungal resistance (46–48). Recent studies show that  
348 the effect of antifungals at subpopulation level is especially crucial to explain the growth of  
349 *Candida* species at supra-MIC concentrations (33). This is mainly due to slow growth of  
350 subpopulations compared to the rest of the cells. The heterogeneous nature of axenic microbial  
351 cultures, and life in general, is an intricate phenomenon that may significantly contribute to our  
352 understanding of antifungal resistance and tolerance. We hope that the single-cell genomics era  
353 will enhance our understanding of the antifungal resistance and tolerance pathways in more  
354 detail.

355

356 Puf4 is a *bona fide* downstream effector of the calcineurin pathway, as it was enriched in  
357 a phosphoproteomics screen of the *cna1Δ* mutant (24). Calcineurin was portrayed to be a  
358 longstanding player in the antifungal resistance of medically important fungi (49). Many groups  
359 have shown that disruption of the calcineurin pathway, genetically or pharmacologically, using  
360 novel or repurposed molecules, abolished the calcium homeostasis and led to death. This  
361 specific inhibition of calcineurin suggested to us that the calcineurin pathway, especially the  
362 downstream effectors, may contain potential targets which can be used as novel antifungal  
363 targets (50). Caspofungin treatment causes the translocation of a calcineurin-dependent  
364 transcription factor, Crz1. Translocation of Crz1 to the nucleus is an event that induces the  
365 transcriptional changes in gene expression in response to caspofungin. Yet, this transcriptional  
366 regulation does not contribute to the caspofungin resistance since the *crz1Δ* exhibits a similar  
367 caspofungin sensitivity to that of wild type cells (19). On the other hand, the absence of Puf4  
368 causes a hyper-resistant phenotype. While the absolute absence of Puf4 yields a resistance  
369 phenotype, we demonstrated that Puf4 protein levels drastically decrease following caspofungin  
370 treatment. Interestingly, this suggests that the downregulation of Puf4 may be necessary for the  
371 paradoxical resistance, hence the hyper-resistant phenotype in the knockout. The converse was  
372 true for the overexpression of Puf4 which showed hyper-sensitivity to caspofungin.

373

374 Further work is needed to determine if the phosphorylation state of Puf4 is governed by  
375 calcineurin, or if there is another post-translational modification, that is responsible for the rapid  
376 reduction in Puf4 protein abundance in response to caspofungin treatment. Inhibition of the  
377 mediator of Puf4 protein repression is another potential target to reverse the intrinsic resistance  
378 of *C. neoformans* to caspofungin. The post-transcriptional regulation of cell wall homeostasis by  
379 Puf4, a calcineurin-regulated RNA-binding protein, is another piece of the regulatory program  
380 that results in the intrinsic resistance of *C. neoformans* to caspofungin. Further elucidation of

381 this regulatory program may open new avenues to promote caspofungin sensitivity in *C.*  
382 *neoformans* through adjunctive therapy.

383

## 384 **Materials and Methods**

### 385 **Yeast strains and molecular cloning.**

386 All strains used in this study were derived from *C. neoformans var. grubii* strain H99, a fully-  
387 virulent strain gifted from Peter Williamson (UIC, NIAID), which is derived from H99O gifted by  
388 John Perfect (Duke University). Primers used to build the knockout and FLAG-tagged  
389 complementation strains are included in Table 2. The plasmid construct to establish the PUF4-  
390 FLAG-(Hyg) mutant included native promoter and the terminator of the gene. Promoter and the  
391 coding sequence were amplified as a single fragment using a forward primer that contained a  
392 NotI cut site, and a reverse primer that contained a Sall cut site as well as the FLAG sequence.  
393 Puf4 terminator fragment was amplified using forward and reverse primers that contained Sall  
394 and BglII sites, respectively. Following restriction digest with respective enzymes, these  
395 fragments were cloned into pSL1180 containing the hygromycin B resistance cassette, as  
396 described previously (51). Construct containing the PUF4-FLAG was introduced into the *puf4*Δ  
397 mutant using biolistics transformation. Copy number were determined using southern blot  
398 analysis. A strain that is a single copy tagged complement, and another strain that is a tagged  
399 overexpression was established.

400

### 401 **Growth analysis: Spot plates and plate reader assay.**

402 Cells were grown overnight at 30°C in 5 mL cultures in YPD broth. Overnight cultures were  
403 washed with sterile distilled water and the OD<sub>600</sub> was equaled to 1 in water. Adjusted cultures  
404 were 1:10 serially diluted 5-times and 5 μl of each dilution spotted on YPD agar plates  
405 containing indicated concentrations of caspofungin (Sigma). Plates were incubated at 30°C for 3  
406 days and photographed. For the kinetic plate reader assay, overnight cultures were washed with



407 water once and then OD<sub>600</sub> was equaled to 0.3 in YPD broth. 50 µl of YPD broth containing the  
408 2x the final caspofungin concentration was placed in each well then 50 µl of the OD<sub>600</sub> adjusted  
409 cultures were placed in each well. Plate was incubated at 30°C for 20 hours while shaking in a  
410 double orbital fashion and OD<sub>600</sub> was measured every 10 minutes during this kinetic assay.

411

#### 412 **Electrophoretic mobility shift assay (EMSA).**

413 EMSA reactions were set and analyzed as described previously (27). Briefly, all RNA binding  
414 reactions contained 5 µg of total protein lysate, 0.5 pmol of the TYE705-labeled  
415 oligonucleotide (IDT), and 4 µl 5x EMSA buffer (75 mM HEPES pH 7.4, 200 mM KCl, 25  
416 mM MgCl<sub>2</sub>, 25% glycerol, 5 mM dithiothreitol (DTT), and 0.5 mg/ml yeast tRNA) in a total  
417 volume of 20 µl. For competition reactions, 5x, 10x, and 20x more unlabeled wild type or  
418 mutant oligonucleotides added in addition to the TYE705-labeled oligonucleotide. Reaction  
419 mixtures were incubated at room temperature for 20 minutes, and run on DNA retardation  
420 gel, then electrophoresed at 100V. Gels were imaged using a LiCor Odyssey imaging  
421 system.

422

#### 423 **Motif Search - FIMO: Find Individual Motif Occurrences**

424 Cell wall biosynthesis genes were scanned for the Puf4-binding-element using the FIMO tool on  
425 the MEME-suite version 5.1.0 (52). RNA sequences of the cell wall biosynthesis genes in Table  
426 1 were acquired from FungiDB and provided as the input. **UGUANNNUA** motif was scanned  
427 using the default settings. Only the given strand was searched and the p-value criterion was set  
428 as p<0.0005 for significance cut-off. Results were manually curated to ensure accuracy in  
429 detecting the desired motif.

430

#### 431 **RNA stability time-course.**

432 Overnight cultures grown at 30°C were used to inoculate 35 mL of YPD broth at the OD<sub>600</sub>  
433 between 0.15 - 0.2 in baffled erlenmeyer flasks. Cultures were grown in baffled flasks at 30 °C  
434 while shaking at 250 rpm until they reach the mid-log stage – OD<sub>600</sub> between 0.6 and 0.7. Mid-  
435 log stage cultures were supplemented with 250 µg/mL of the transcriptional inhibitor  
436 1,10-phenanthroline (Sigma). Then, 5-mL aliquots of each culture were transferred to snap cap  
437 tubes and pelleted every 15 minutes for 60 minutes. 50 µL RLT supplemented with 1% β-  
438 mercaptoethanol was added to each pellet prior to flash freezing in liquid nitrogen. Pellets were  
439 stored at -80 °C until RNA extraction. Cells were lysed by bead beating using glass beads. RNA  
440 was extracted from each sample using the RNeasy Mini Kit (QIAGEN) following manufacturer's  
441 instructions. RNA was DNase digested on-column using the RNase free DNase Kit (QIAGEN)  
442 or using the AMBION TURBO DNA-free Kit (ThermoFisher). cDNA for real time quantitative  
443 PCR (RT-qPCR) was synthesized using the Applied Biosystems High Capacity cDNA Reverse  
444 Transcription Kit (ThermoFisher) using random hexamers. 800 ng to 1000 ng RNA was used to  
445 synthesize cDNA. Samples were quantified using the second-derivative-maximum method and  
446 fitted to a standard curve of five 4-fold serial dilutions of cDNA. For experimental samples,  
447 cDNA was diluted 1:5 in nuclease-free water. To make the reaction mixture, 5 µL of the 2X  
448 SYBR Green Blue Mix (PCRbiosystems) was combined with 4 µL of 1.5 µM primers (970 µL  
449 water + 15 µL forward +15 µL reverse). 9 µL reaction mixture was placed in each well and 1 µL of  
450 either experimental samples or standards added to their respective wells. Samples from 3  
451 biological samples in duplicate wells were tested. Primer sequences are listed in Table 2 in the  
452 along with the gene IDs. Statistical differences were compared by determining the least squares  
453 fit of one-phase exponential decay non-linear regression analysis with GraphPad Prism  
454 software. Significance between curves was detected with the P-value cut-off of 0.05, which  
455 determined that the data from two different curves create different regression lines therefore  
456 yielding to different half-lives of the same transcript investigated in different mutants.

457 **Caspofungin time-course.**

458 Cells were grown to the mid-log stage as described in the previous section. At this stage,  
459 cultures were supplemented with 16 µg/mL caspofungin and 5 mL aliquots were collected in  
460 snap-cap tubes every 15 minutes for 60 minutes. 50 µl of buffer RLT supplemented with 1% β-  
461 mercaptoethanol was added to each pellet prior to flash freezing in liquid nitrogen. Pellets were  
462 stored at -80 °C until RNA extraction. Cells were lysed by bead beating using glass beads. RNA  
463 was extracted from each sample, cDNA was synthesized and transcript abundances were  
464 calculated using RT-qPCR as described in the previous section. Primer sequences are listed in  
465 Table 2. Statistical differences were determined using a two-way-ANOVA.

466

467 **Immunoblotting.**

468 Cells were grown to the mid-logarithmic stage and half of the culture were treated with 16 µg/mL  
469 caspofungin for an hour while the other half was left untreated. Cell pellets were flash frozen in  
470 liquid nitrogen and stored at -80 °C. At the time of lysis, 50 µl cold lysis buffer (50 mM Tris HCl  
471 pH 7.4, 150 mM NaCl, 1 mM EDTA, 1% Triton X100, 10 µl/ml HALT protease and phosphatase  
472 inhibitor [ThermoFisher]) was added and cells were lysed by bead beating using glass beads.  
473 250 µl of the cold lysis buffer was added to the beads and lysate was extracted from the glass  
474 beads. Lysate was centrifuged at 20,000 x g for 15 min, and supernatant was transferred to a  
475 new tube. Protein quantities were measured using Pierce 660nm Protein Assay Kit  
476 (ThermoFisher). 25 µg of protein was run per sample on 4-15% Mini-PROTEAN TGX stain-free  
477 precast gels (BioRad) at 150V. Total protein was imaged using a BioRad Gel Documentation  
478 System with the stain-free gel setting. Gels were transferred to nitrocellulose membrane and  
479 blocked with LiCor Odyssey blocking buffer for an hour. Then, incubated overnight with the  
480 mouse Anti-FLAG antibody (1:1000 in Tris-Buffered Saline-Tween20 [TBS-T] with 10% LiCor  
481 Odyssey blocking buffer) at 4°C. The blot was washed three times with 15 minutes incubations  
482 in TBS-T. Then, LiCor rabbit anti-mouse 800 secondary antibody (1:10000 in TBS-T with 10%

483 LiCor Odyssey blocking buffer) was added. The blot was incubated with the secondary antibody  
484 for an hour at room temperature, then washed with TBS-T and blot was imaged using a LiCor  
485 Odyssey imaging system.

486

#### 487 **Cell wall staining, microscopy and flow cytometry.**

488 Cells were grown to the mid-log stage and treated with caspofungin as described previously.  
489 Cells were prepared and cell wall components were stained for microscopic and flow cytometric  
490 analyses as previously published (43, 53). Briefly, cells were pelleted and washed with 1X PBS  
491 once. Cells were fixed with 3.7% formaldehyde for 5 minutes at room temperature, and washed  
492 with 1X PBS twice.

493

494 Cells were stained with calcofluor and FITC-conjugated wheat germ agglutinin (WGA:  
495 Molecular Probes) to visualize chitin. Calcofluor dye stains the total chitin while WGA only stains  
496 the exposed chitooligomers. Cells were incubated in the dark with 100 µg/ml FITC-WGA for 35  
497 minutes, then consecutively stained with 25 µg/ml calcofluor white for 15 minutes. Cells were  
498 washed twice with 1X PBS before analysis. Stained cells were imaged using a Leica TCS SP8  
499 Confocal Microscope. For microscopy, WGA was detected using the GFP settings and  
500 calcofluor was detected using the DAPI settings. Images were taken using the 100X objective.  
501 Representative images were shown. Flow cytometry data was acquired using a BD  
502 LSRFortessa Cell Analyzer. WGA signal was detected using 488nm laser, and the calcofluor  
503 was detected using the 405nm laser. Flow cytometry data were analyzed FlowJo v10.0  
504 software. Representative histogram graphs were shown.

505

506 Cells were stained with Aniline Blue to detect the  $\beta$ -1,3-glucan levels. Unfixed mid-log  
507 stage cells in YPD, untreated and treated with 16 µg/ml caspofungin, were washed with 1X PBS

508 and stained with 0.05% Aniline Blue (Wako Chemicals, Japan) for 10 minutes, and then cells  
509 were imaged using the DAPI channel on the Leica TCS SP8 Confocal Microscope. Microscopy  
510 images were analyzed using the Fiji (Image J, NIH). Mean fluorescent intensity of at least 100  
511 cells in 3-4 different fields were quantified and normalized. Representative images are shown.

512

### 513 **Statistical Analysis.**

514 Data analysis was performed using the GraphPad Prism software version 6. Each figure legend  
515 contains the statistical test information that is used to assess the statistical significance. Briefly,  
516 we have utilized the one-phase exponential decay analysis to determine the half-life of the  
517 mRNAs analyzed. Immunoblot data was analyzed using unpaired t-test with Welch's correction.  
518 Gene expression and microscopy quantification data were analyzed using either one-way or  
519 two-way-ANOVA followed by a post-hoc multiple comparison test. For all of the graphs, \*:  
520  $p < 0.05$ , \*\*\*  $p < 0.001$  and \*\*\*\*:  $p < 0.0001$ . All error bars represent the SEM.

521

### 522 **Acknowledgements**

523 We would like to acknowledge Dr. Amanda L. M. Bloom for advice and stimulating discussions.  
524 This work was funded by NIH R21 AI133133 to JCP.

525

526

527

528

529

530

531

532

533

534 **References**

- 535 1. Park BJ, Wannemuehler KA, Marston BJ, Govender N, Pappas PG, Chiller TM. 2009.  
536 Estimation of the current global burden of cryptococcal meningitis among persons living  
537 with HIV/AIDS. *Aids* 23:525–530.
- 538 2. Pyrgos V, Seitz AE, Steiner CA, Prevots DR, Williamson PR. 2013. Epidemiology of  
539 Cryptococcal Meningitis in the US: 1997-2009. *PLoS One* 8.
- 540 3. El Helou G, Hellinger W. 2019. *Cryptococcus neoformans* Pericarditis in a Lung  
541 Transplant Recipient: Case Report, Literature Review and Pearls. *Transpl Infect Dis* 0–1.
- 542 4. Kabir V, Maertens J, Kuypers D. 2018. Fungal infections in solid organ transplantation:  
543 An update on diagnosis and treatment. *Transplant Rev*.
- 544 5. Malhotra P, Shah SS, Kaplan M, McGowan JP. 2005. Cryptococcal fungemia in a  
545 neutropenic patient with AIDS while receiving caspofungin. *J Infect* 51:181–183.
- 546 6. Rajasingham R, Smith RM, Park BJ, Jarvis JN, Govender NP, Chiller TM, Denning DW,  
547 Loyse A, Boulware DR. 2017. Global burden of disease of HIV-associated cryptococcal  
548 meningitis: an updated analysis. *Lancet Infect Dis*.
- 549 7. Loyse A, Wilson D, Meintjes G, Jarvis JN, Bicanic T, Bishop L, Rebe K, Williams A, Jaffar  
550 S, Bekker LG, Wood R, Harrison TS. 2012. Comparison of the early fungicidal activity of  
551 high-dose fluconazole, voriconazole, and flucytosine as second-line drugs given in  
552 combination with amphotericin B for the treatment of HIV-associated cryptococcal  
553 meningitis. *Clin Infect Dis* 54:121–128.
- 554 8. Roemer T, Krysan DJ. 2014. Antifungal drug development: challenges, unmet clinical  
555 needs, and new approaches. *Cold Spring Harb Perspect Med* 4:a019703.
- 556 9. Perfect JR. 2017. The antifungal pipeline: A reality check. *Nat Rev Drug Discov* 16:603–  
557 616.
- 558 10. Gaskell KM, Rothe C, Gnanadurai R, Goodson P, Jassi C, Heyderman RS, Allain TJ,  
559 Harrison TS, Lalloo DG, Sloan DJ, Feasey NA. 2014. A prospective study of mortality

- 560 from cryptococcal meningitis following treatment induction with 1200mg oral fluconazole  
561 in Blantyre, Malawi. PLoS One 9:9–12.
- 562 11. Hope W, Stone NRH, Johnson A, McEntee L, Farrington N, Santoro-Castelazo A, Liu X,  
563 Lucaci A, Hughes M, Oliver JD, Giamberardino C, Mfinanga S, Harrison TS, Perfect JR,  
564 Bicanic T. 2019. Fluconazole monotherapy is a suboptimal option for initial treatment of  
565 cryptococcal meningitis because of emergence of resistance. MBio 10:1–17.
- 566 12. Johnson MD, Perfect JR. 2003. Caspofungin: First approved agent in a new class of  
567 antifungals. Expert Opin Pharmacother 4:807–823.
- 568 13. Maligie MA, Selitrennikoff CP. 2005. *Cryptococcus neoformans* resistance to  
569 echinocandins: (1,3) $\beta$ -glucan synthase activity is sensitive to echinocandins. Antimicrob  
570 Agents Chemother 49:2851–2856.
- 571 14. Yang F, Zhang L, Wakabayashi H, Myers J, Jiang Y, Cao Y, Jimenez-Ortigosa C, Perlin  
572 DS, Rustchenko E. 2017. Tolerance to caspofungin in *Candida albicans* is associated  
573 with at least three distinctive mechanisms that govern expression of FKS genes and cell  
574 wall remodeling. Antimicrob Agents Chemother 61:1–13.
- 575 15. Imtiaz T, Lee KK, Munro CA, MacCallum DM, Shankland GS, Johnson EM, MacGregor  
576 MS, Bal AM. 2012. Echinocandin resistance due to simultaneous FKS mutation and  
577 increased cell wall chitin in a *Candida albicans* bloodstream isolate following brief  
578 exposure to caspofungin. J Med Microbiol 61:1330–1334.
- 579 16. Kraus PR, Fox DS, Cox GM, Heitman J. 2003. The *Cryptococcus neoformans* MAP  
580 kinase Mpk1 regulates cell integrity in response to antifungal drugs and loss of  
581 calcineurin function. Mol Microbiol 48:1377–1387.
- 582 17. Lee KK, MacCallum DM, Jacobsen MD, Walker LA, Odds FC, Gow NAR, Munro CA.  
583 2012. Elevated cell wall chitin in *Candida albicans* confers echinocandin resistance in  
584 vivo. Antimicrob Agents Chemother 56:208–217.
- 585 18. Walker LA, Gow NAR, Munro CA. 2013. Elevated chitin content reduces the susceptibility

- 586 of *Candida* species to caspofungin. *Antimicrob Agents Chemother* 57:146–154.
- 587 19. Pianalto KM, Blake Billmyre R, Telzrow CL, Andrew Alspaugh J. 2019. Roles for stress  
588 response and cell wall biosynthesis pathways in caspofungin tolerance in *Cryptococcus*  
589 *neoformans*. *Genetics* 213:213–227.
- 590 20. Cao C, Wang Y, Husain S, Soteropoulos P, Xue C. 2019. A mechanosensitive channel  
591 governs lipid flippase-mediated echinocandin resistance in *Cryptococcus neoformans*.  
592 *MBio* 10:1–18.
- 593 21. Juvvadi PR, Muñoz A, Lamoth F, Soderblom EJ, Moseley MA, Read ND, Steinbach WJ.  
594 2015. Calcium-mediated induction of paradoxical growth following caspofungin treatment  
595 is associated with calcineurin activation and phosphorylation in *Aspergillus fumigatus*.  
596 *Antimicrob Agents Chemother* 59:4946–4955.
- 597 22. Kontoyiannis DP, Lewis RE, Osherov N, Albert ND, May GS. 2003. Combination of  
598 caspofungin with inhibitors of the calcineurin pathway attenuates growth in vitro in  
599 *Aspergillus* species. *J Antimicrob Chemother* 51:313–316.
- 600 23. Del Poeta M, Cruz MC, Cardenas ME, Perfect JR, Heitman J. 2000. Synergistic  
601 antifungal activities of bafilomycin A1, fluconazole, and the pneumocandin MK-  
602 0991/caspofungin acetate (L-743,873) with calcineurin inhibitors FK506 and L-685,818  
603 against *Cryptococcus neoformans*. *Antimicrob Agents Chemother* 44:739–746.
- 604 24. Park HS, Chow EWL, Fu C, Soderblom EJ, Moseley MA, Heitman J, Cardenas ME.  
605 2016. Calcineurin Targets Involved in Stress Survival and Fungal Virulence. *PLoS Pathog*  
606 12:1–28.
- 607 25. Chow EWL, Clancey SA, Billmyre RB, Averette AF, Granek JA, Mieczkowski P,  
608 Cardenas ME, Heitman J. 2017. Elucidation of the calcineurin-Crz1 stress response  
609 transcriptional network in the human fungal pathogen *Cryptococcus neoformans*. *PLoS*  
610 *Genet* 13:e1006667.
- 611 26. Gerber AP, Herschlag D, Brown PO. 2004. Extensive association of functionally and



- 612 cytotopically related mRNAs with Puf family RNA-binding proteins in yeast. PLoS Biol 2.
- 613 27. Glazier VE, Kaur JN, Brown NT, Rivera AA, Panepinto JC. 2015. Puf4 regulates both  
614 splicing and decay of HXL1 mRNA encoding the unfolded protein response transcription  
615 factor in *Cryptococcus neoformans*. Eukaryot Cell 14:385–395.
- 616 28. Gerik KJ, Donlin MJ, Soto CE, Banks AM, Banks IR, Maligie MA, Selitrennikoff CP,  
617 Lodge JK. 2005. Cell wall integrity is dependent on the PKC1 signal transduction pathway  
618 in *Cryptococcus neoformans*. Mol Microbiol 58:393–408.
- 619 29. Smith MM, McCully ME. 1978. A critical evaluation of the specificity of aniline blue  
620 induced fluorescence. Protoplasma.
- 621 30. Baker LG, Specht CA, Donlin MJ, Lodge JK. 2007. Chitosan, the deacetylated form of  
622 chitin, is necessary for cell wall integrity in *Cryptococcus neoformans*. Eukaryot Cell  
623 6:855–867.
- 624 31. Upadhy R, Baker LG, Lam WC, Specht CA, Donlin MJ, Lodge JK. 2018. *Cryptococcus*  
625 *neoformans* *cda1* and its chitin deacetylase activity are required for fungal pathogenesis.  
626 MBio 9:1–19.
- 627 32. Bloom ALM, Leipheimer J, Panepinto JC. 2017. mRNA decay: an adaptation tool for the  
628 environmental fungal pathogen *Cryptococcus neoformans*. Wiley Interdiscip Rev RNA 8.
- 629 33. Rosenberg A, Ene I V., Bibi M, Zakin S, Segal ES, Ziv N, Dahan AM, Colombo AL,  
630 Bennett RJ, Berman J. 2018. Antifungal tolerance is a subpopulation effect distinct from  
631 resistance and is associated with persistent candidemia. Nat Commun 9.
- 632 34. Litvintseva AP, Brandt ME, Mody RK, Lockhart SR. 2015. Investigating Fungal Outbreaks  
633 in the 21st Century. PLoS Pathog 11:1–6.
- 634 35. Cao C, Wang Y, Husain S, Soteropoulos P, Xue C. 2019. Echinocandin Resistance in  
635 *Cryptococcus neoformans* 1–18.
- 636 36. Feldmesser M, Kress Y, Mednick A, Casadevall A. 2000. The Effect of the Echinocandin  
637 Analogue Caspofungin on Cell Wall Glucan Synthesis by *Cryptococcus neoformans* . J

- 638 Infect Dis 182:1791–1795.
- 639 37. Wang M, Ogé L, Perez-Garcia MD, Hamama L, Sakr S. 2018. The PUF protein family:  
640 Overview on PUF RNA targets, biological functions, and post transcriptional regulation.  
641 Int J Mol Sci 19:1–13.
- 642 38. Hook BA, Goldstrohm AC, Seay DJ, Wickens M. 2007. Two yeast PUF proteins  
643 negatively regulate a single mRNA. J Biol Chem 282:15430–15438.
- 644 39. Quenault T, Lithgow T, Traven A. 2011. PUF proteins: Repression, activation and mRNA  
645 localization. Trends Cell Biol.
- 646 40. Cookea A, Prigge A, Opperman L, Wickens M. 2011. Targeted translational  
647 regulation using the PUF protein family scaffold. Proc Natl Acad Sci U S A.
- 648 41. Fischer AD, Olivas WM. 2018. Multiple Puf proteins regulate the stability of ribosome  
649 biogenesis transcripts. RNA Biol 15:1228–1243.
- 650 42. Lima SL, Colombo AL, de Almeida Junior JN. 2019. Fungal Cell Wall: Emerging  
651 Antifungals and Drug Resistance. Front Microbiol 10:1–9.
- 652 43. Esher SK, Ost KS, Kohlbrenner MA, Pianalto KM, Telzrow CL, Campuzano A, Nichols  
653 CB, Munro C, Wormley FL, Alspaugh JA. 2018. Defects in intracellular trafficking of  
654 fungal cell wall synthases lead to aberrant host immune recognition. PLoS Pathogens.
- 655 44. Bloom ALM, Jin RM, Leipheimer J, Bard JE, Yergeau D, Wohlfert EA, Panepinto JC.  
656 2019. Thermotolerance in the pathogen *Cryptococcus neoformans* is linked to antigen  
657 masking via mRNA decay-dependent reprogramming. Nat Commun 10:1–13.
- 658 45. Agostinho DP, Miller LC, Li LX, Doering TL. 2018. Peeling the onion: The outer layers of  
659 *Cryptococcus neoformans*. Mem Inst Oswaldo Cruz 113:1–8.
- 660 46. Hogan DA, Gladfelter AS. 2015. Editorial overview: Host-microbe interactions: Fungi:  
661 Heterogeneity in fungal cells, populations, and communities. Curr Opin Microbiol 26:vii–  
662 ix.
- 663 47. Wang L, Lin X. 2015. The morphotype heterogeneity in *Cryptococcus neoformans*. Curr

- 664 Opin Microbiol 26:60–64.
- 665 48. Scaduto CM, Bennett RJ. 2015. *Candida albicans* the chameleon: Transitions and  
666 interactions between multiple phenotypic states confer phenotypic plasticity. Curr Opin  
667 Microbiol 26:102–108.
- 668 49. Juvvadi PR, Lee SC, Heitman J, Steinbach WJ. 2017. Calcineurin in fungal virulence and  
669 drug resistance: Prospects for harnessing targeted inhibition of calcineurin for an  
670 antifungal therapeutic approach. Virulence 8:186–197.
- 671 50. Liu S, Hou Y, Liu W, Lu C, Wang W, Sun S. 2015. Components of the calcium-calcineurin  
672 signaling pathway in fungal cells and their potential as antifungal targets. Eukaryot Cell  
673 14:324–334.
- 674 51. Panepinto JC, Komperda KW, Hacham M, Shin S, Liu X, Williamson PR. 2007. Binding of  
675 serum mannan binding lectin to a cell integrity-defective *Cryptococcus neoformans ccr4Δ*  
676 mutant. Infect Immun 75:4769–4779.
- 677 52. Grant CE, Bailey TL, Noble WS. 2011. FIMO: Scanning for occurrences of a given motif.  
678 Bioinformatics 27:1017–1018.
- 679 53. Watanabe D, Abe M, Ohya Y. 2001. Yeast Lrg1p acts as a specialized RhoGAP  
680 regulating 1,3-beta-glucan synthesis. Yeast 18:943–951.

681

682

683

684

685

686

687

688

689

690 **Figure Legends**

691

692 **Figure 1. The *puf4*Δ mutant is resistant to caspofungin.** (A) Spot plate analysis. The  
693 indicated strains were diluted to an OD<sub>600</sub> of 1.0 and five, 1:10 serial dilutions were spotted on  
694 agar plates containing 0, 16, 32, 40, and 48 μg/ml caspofungin. Plates were incubated at 30°C  
695 for 3 days and photographed. (B-C) Growth assay. The indicated strains were diluted to an  
696 OD<sub>600</sub> of 0.3 and mixed 1:1 with either fresh YPD or YPD containing caspofungin in a 96 well-  
697 plate. Plates were incubated and at 30°C for 20 hours while shaking. OD<sub>600</sub> was measured every  
698 10 minutes.

699

700 **Figure 2. Puf4 directly binds and stabilizes the *FKS1* mRNA.** (A) The *FKS1* mRNA contains  
701 Puf4 binding elements (PBE) in its 5' UTR - UGUANNNUA. (B) Puf4 binds to *FKS1*.  
702 Electrophoretic mobility shift assay was performed using a fluorescently labeled synthetic RNA  
703 oligonucleotide designed for the *FKS1* 5'UTR that contain the PBEs. Unlabeled mutant  
704 (contains mutated PBEs) and unlabeled wild type probes were used as controls for sequence  
705 specificity. *puf4*Δ was included as a control to show binding is absent when Puf4 is not present.  
706 A representative gel image is shown, n=3. (C) The *FKS1* is downregulated in the *puf4*Δ. The  
707 *FKS1* mRNA abundance in mid-log samples grown at 30°C was determined using RT-qPCR  
708 with *GPD1* as the normalization gene. 3 replicates were plotted and unpaired t-test with Welch's  
709 correction was performed, \*: p<0.05. (D) The *FKS1* is destabilized in the *puf4*Δ mutant. *FKS1*  
710 abundance was determined using RT-qPCR following transcription shut-off to determine the  
711 decay kinetics. *GPD1* was utilized as the control for normalization. 3 replicates were plotted  
712 and differences among two strains were analyzed using one-phase exponential decay analysis.  
713 Error bars show SEM.

714

715 **Figure 3. Puf4 protein expression is decreased following caspofungin treatment.** (A)  
716 *PUF4* transcript levels are unchanged during a 60-minute caspofungin time course. Cells were  
717 grown at 30°C and treated with caspofungin. The abundance of *FKS1* mRNA was determined in  
718 samples collected every 15 minutes using RT-qPCR with *GPD1* as the normalization gene. 3  
719 replicates were plotted and one-way-ANOVA using Tukey's test was performed,  $p=0.5814$  (B)  
720 Puf4 protein levels are decreased following 60-minute caspofungin treatment. Puf4-FLAG strain  
721 (*puf4* $\Delta$  expressing *PUF4-FLAG* C-terminal fusion) was grown to mid-log and treated with  
722 caspofungin for 1 hour. SDS-PAGE followed by immunoblotting using anti-flag antibody is  
723 shown. (C) Anti-flag signal is normalized to total protein signal from the stain-free gel. 5  
724 replicates were plotted and unpaired t-test with Welch's correction was performed, \*\*:  $p<0.01$ .  
725 Error bars show SEM.

726

727 **Figure 4. Puf4-dependent *FKS1* regulation correlates with reduced  $\beta$ -1,3-glucan staining.**

728 (A) *FKS1* abundance is regulated by Puf4 during a 60-minute caspofungin time course. Cells  
729 were grown at 30°C and treated with caspofungin. The abundance of *FKS1* mRNA was  
730 determined in samples collected every 15 minutes using RT-qPCR with *GPD1* as the  
731 normalization gene. 3 replicates were plotted and one-way-ANOVA using Tukey's test was  
732 performed. (B) The *puf4* $\Delta$  mutant has decreased levels of  $\beta$ -1,3-glucan. Cells were grown to  
733 mid-log at 30°C and stained with Aniline Blue to detect  $\beta$ -1,3-glucan. Representative Aniline  
734 Blue staining images for each strain is shown to assess both levels and localization. (C)  
735 Microscopy images were quantified on Fiji and Aniline Blue signal was normalized to DIC signal.  
736 At least 5 fields from 3 biological replicates were plotted and one-way-ANOVA followed by  
737 Dunn's multiple comparisons test was performed. \*:  $p<0.05$ , \*\*:  $p<0.01$  Error bars show SEM.

738

739 **Figure 5. Deletion of *PUF4* leads to dysregulation of certain cell wall biosynthesis genes.**

740 The mRNA abundance of select cell wall biosynthesis genes was determined during a 60-  
741 minute caspofungin time course by collecting samples every 15 minutes and determining  
742 abundance by RT-qPCR using *GPD1* as a normalization gene. (A) *CHS3*, (B) *CHS4*, (C) *CHS6*,  
743 (D) *CDA1*, (E) *CDA2*, (F) *CDA3*, (G) *AGS1*, (H) *KRE6*, and (I) *SKN1*. 3 biological replicates with  
744 2 technical replicates were plotted and two-way ANOVA was used to determine statistical  
745 significance. '#' denotes comparison between wild type and *puf4*Δ while '\*' denotes comparison  
746 between indicated time points within a strain. #/!: p<0.05, ##/!\*: p<0.01, ###/!\*\*\* p<0.001 and  
747 #####/!\*\*\*\*: p<0.0001. Error bars show SEM.

748

749 **Figure 6. Puf4 stabilizes cell wall biosynthesis genes involved in chitin and α-glucan**

750 **synthesis.** (A) *CHS3*, (B) *CHS4*, (C) *CDA3*, (D) *AGS1*, (E) *CDA1* transcript abundance were  
751 determined using RT-qPCR following transcription-shutoff to determine the decay kinetics.  
752 *GPD1* was utilized as the control for normalization. 15 minutes post-transcription shut-off was  
753 denoted as t=0. 3 replicates were plotted and differences among two strains were analyzed  
754 using one-phase exponential decay analysis. Error bars show SEM.

755

756 **Figure 7. Caspofungin treatment leads to increased cell wall chitin which is exacerbated**

757 **in the *puf4*Δ mutant.** (A-C) Cell wall chitin levels are increased response to caspofungin. Cells  
758 were grown to mid-log at 30°C and stained with calcofluor white, then fluorescent intensity (A-B)  
759 and staining pattern (C) were determined using flow cytometry and fluorescence microscopy,  
760 respectively. (D-E) Levels of exposed chitooligomers did not change significantly. Exposed  
761 chitooligomers were stained using wheat germ agglutinin conjugated with FITC. Fluorescent  
762 intensity was determined using flow cytometry. For (A) and (D), 3 biological replicates were

763 plotted and one-way-ANOVA followed by Dunn's multiple comparisons test was performed. \*:

764  $p < 0.05$ , \*\*\*  $p < 0.001$  and \*\*\*\*:  $p < 0.0001$ . Error bars show SEM.

765

766 **Figure 8. Model: Post-transcriptional regulation of cell wall remodeling by Puf4 is a path**

767 **to caspofungin resistance in *C. neoformans*.** In the wild type cells, *FKS1* is stabilized by

768 Puf4. When wild type cells are treated with caspofungin, we observe increase of cell wall chitin

769 and  $\beta$ -1,3-glucan staining intensity. In the *puf4* $\Delta$ , *FKS1* as well as other cell wall biosynthesis

770 transcripts are destabilized. Therefore, we observed a different response to caspofungin in the

771 *puf4* $\Delta$  involving a robust increase in cell wall chitin content. Graphics modified from (9).

772

773

774

775

776

777

**A**

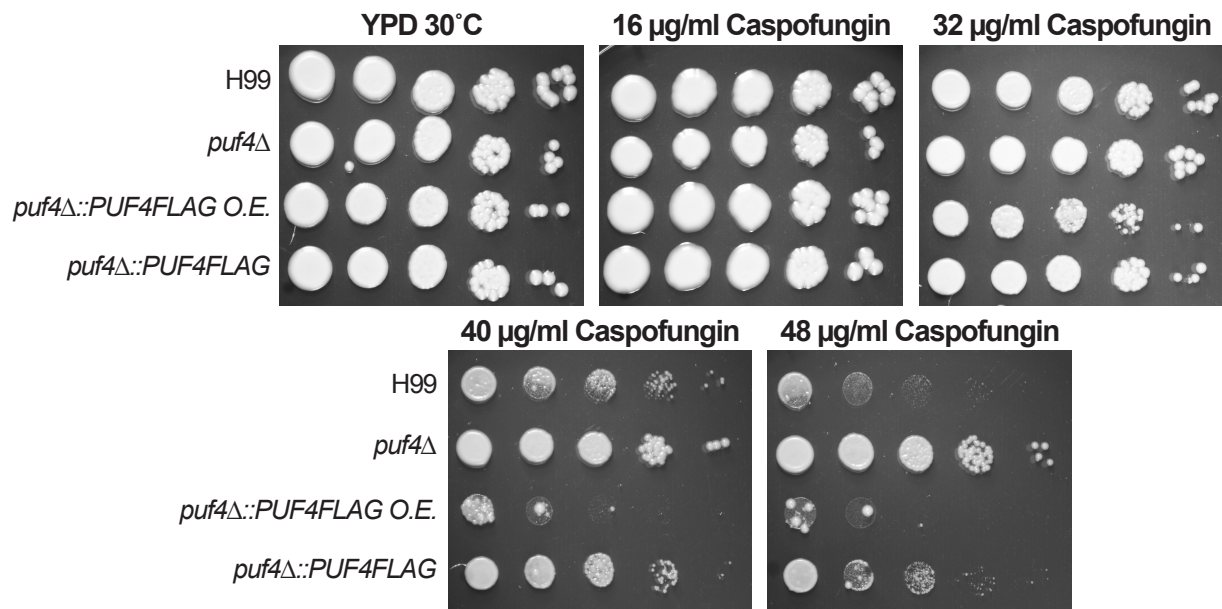

**B**

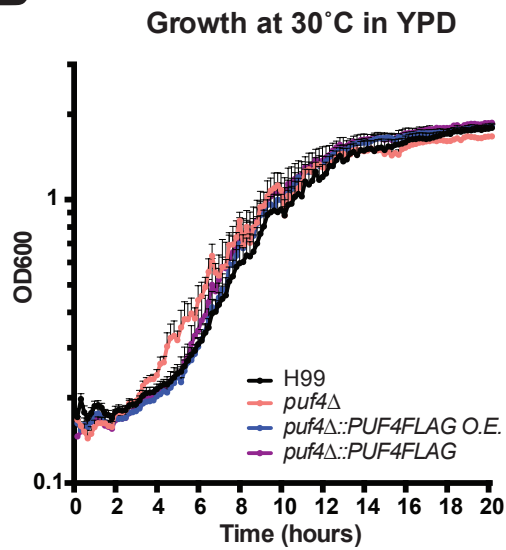

**C**

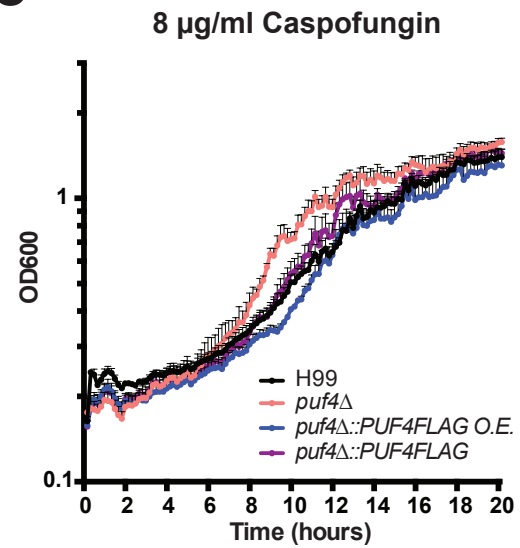



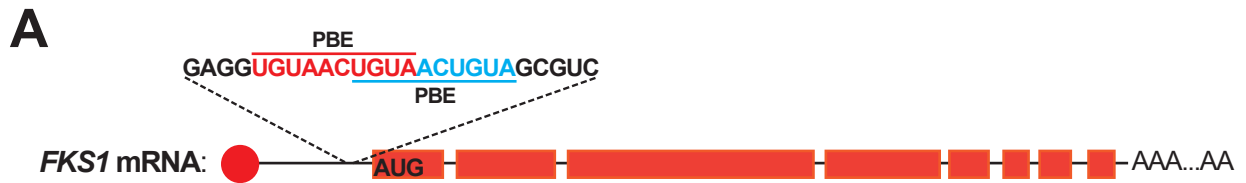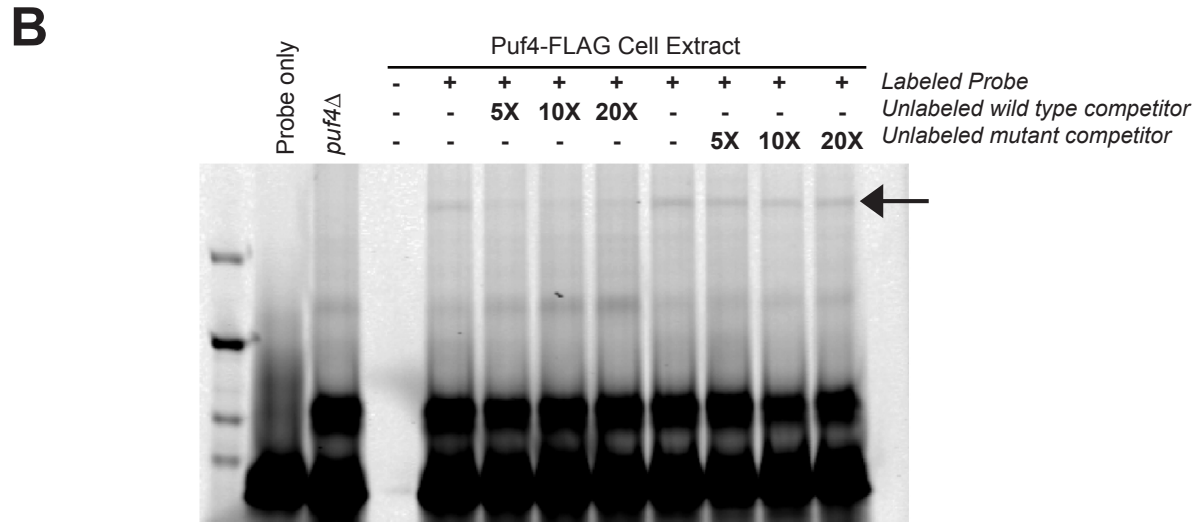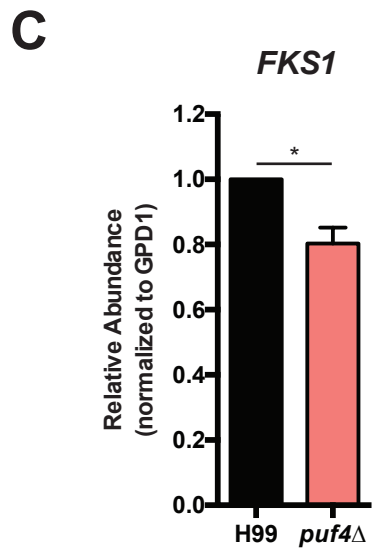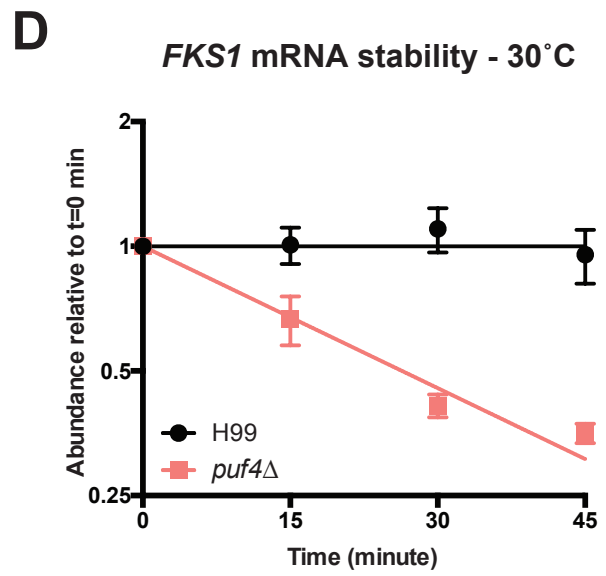

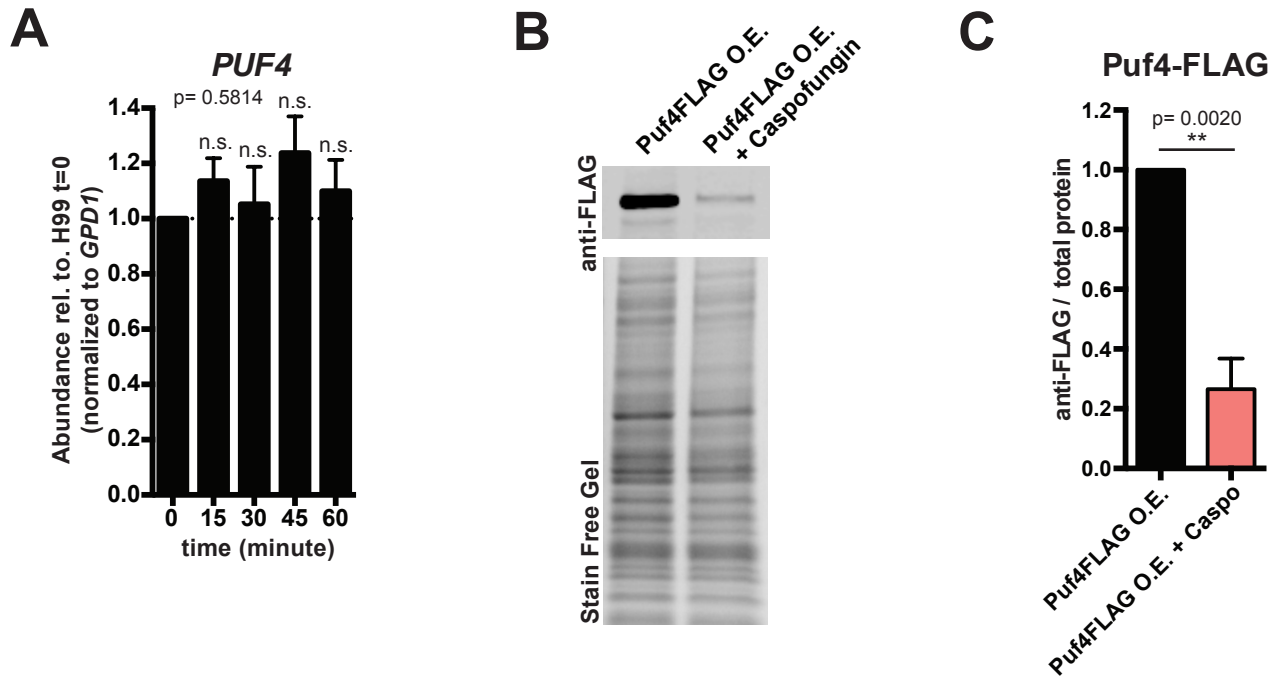

**A** *FKS1*

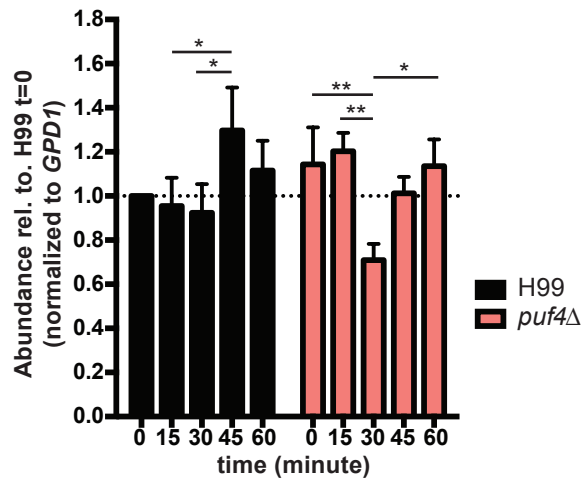

**B**

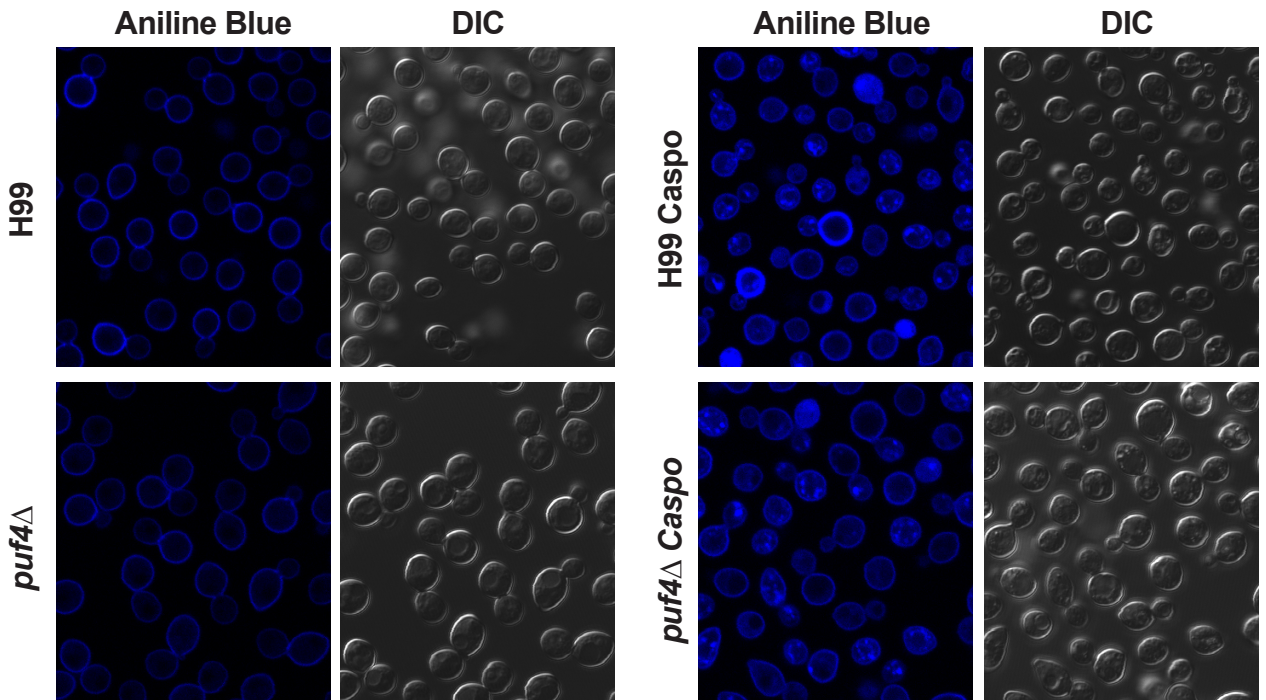

**C**

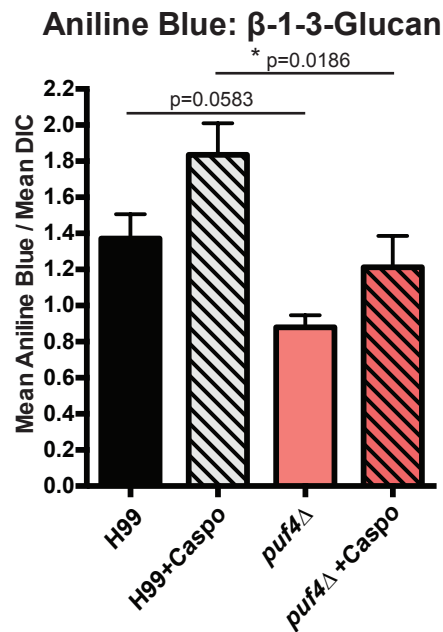

**Fig. 5.**

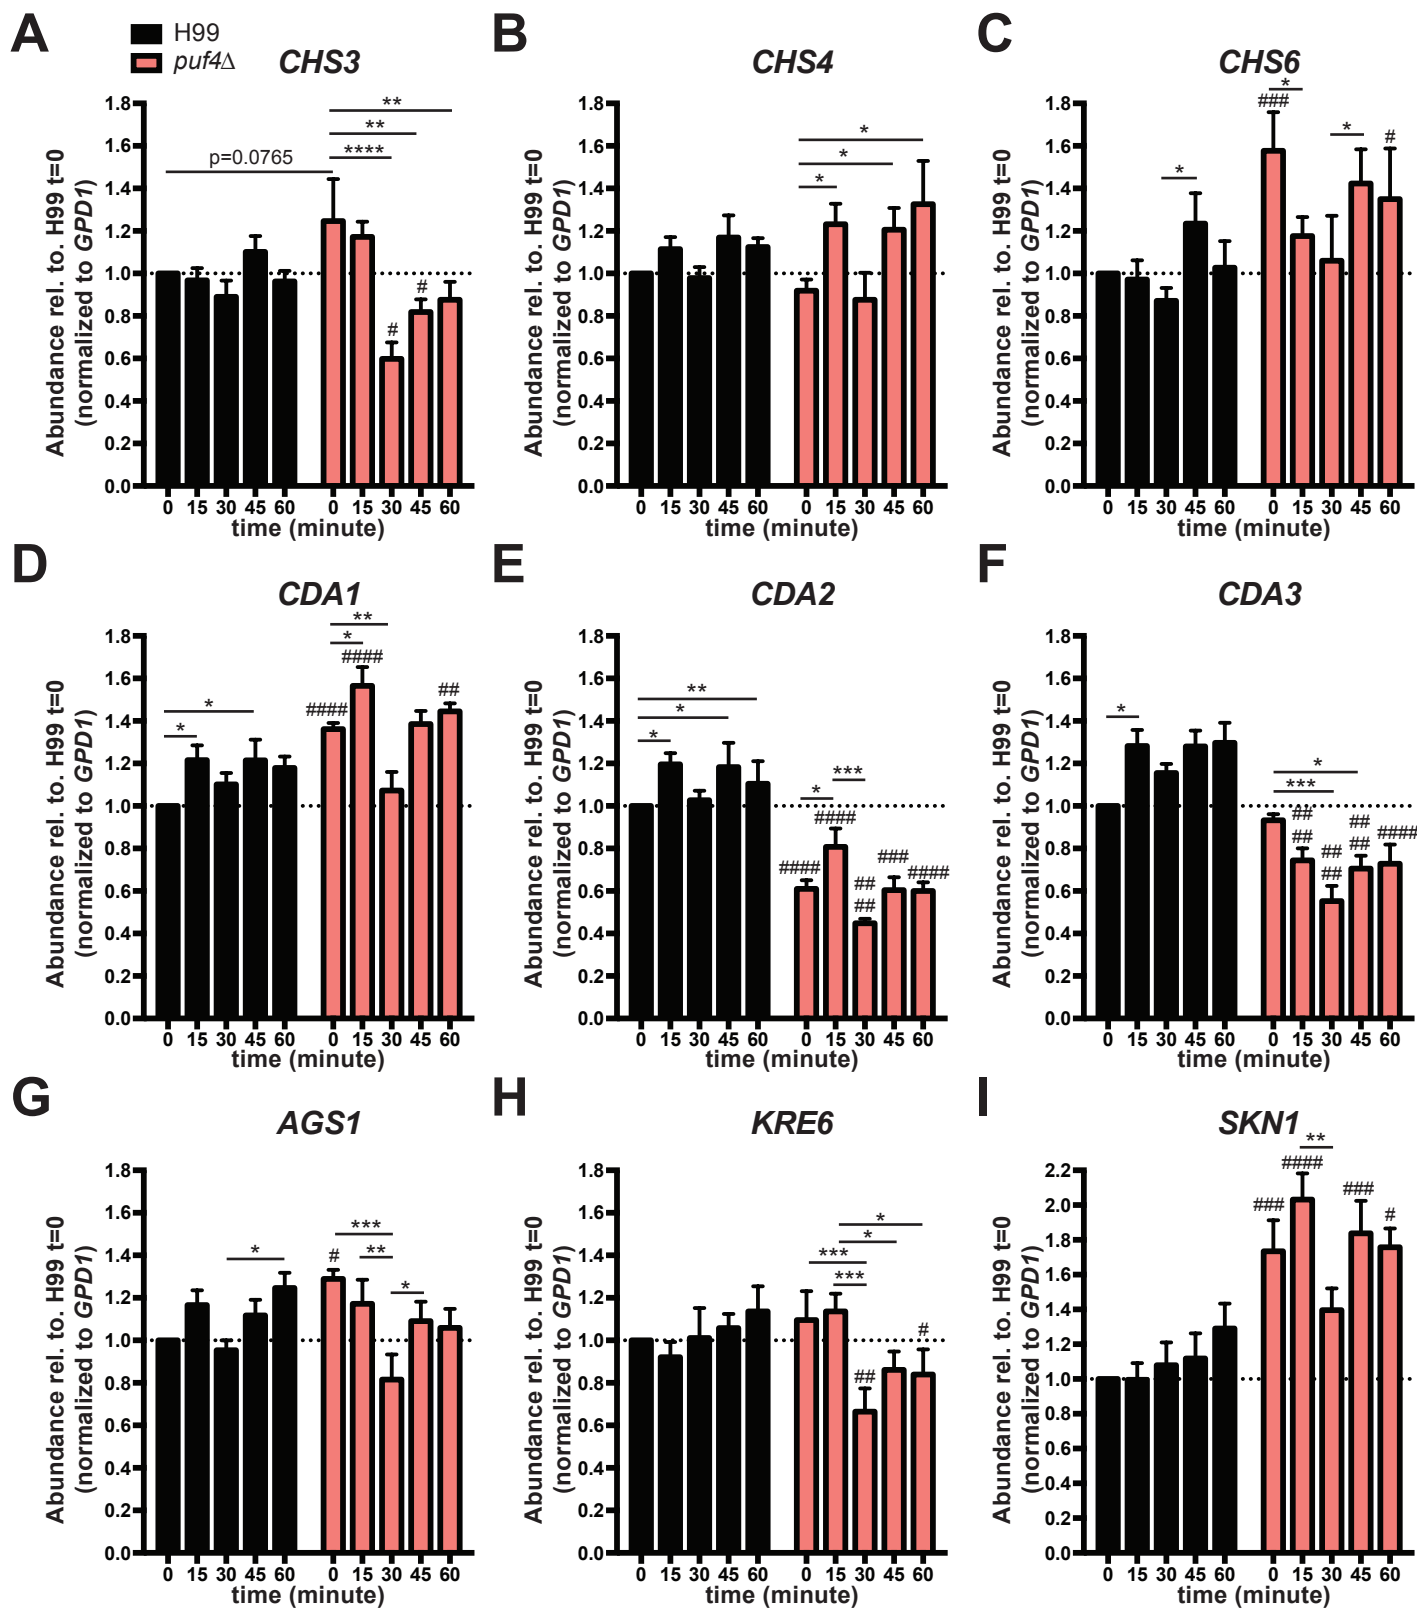

# Fig. 6.

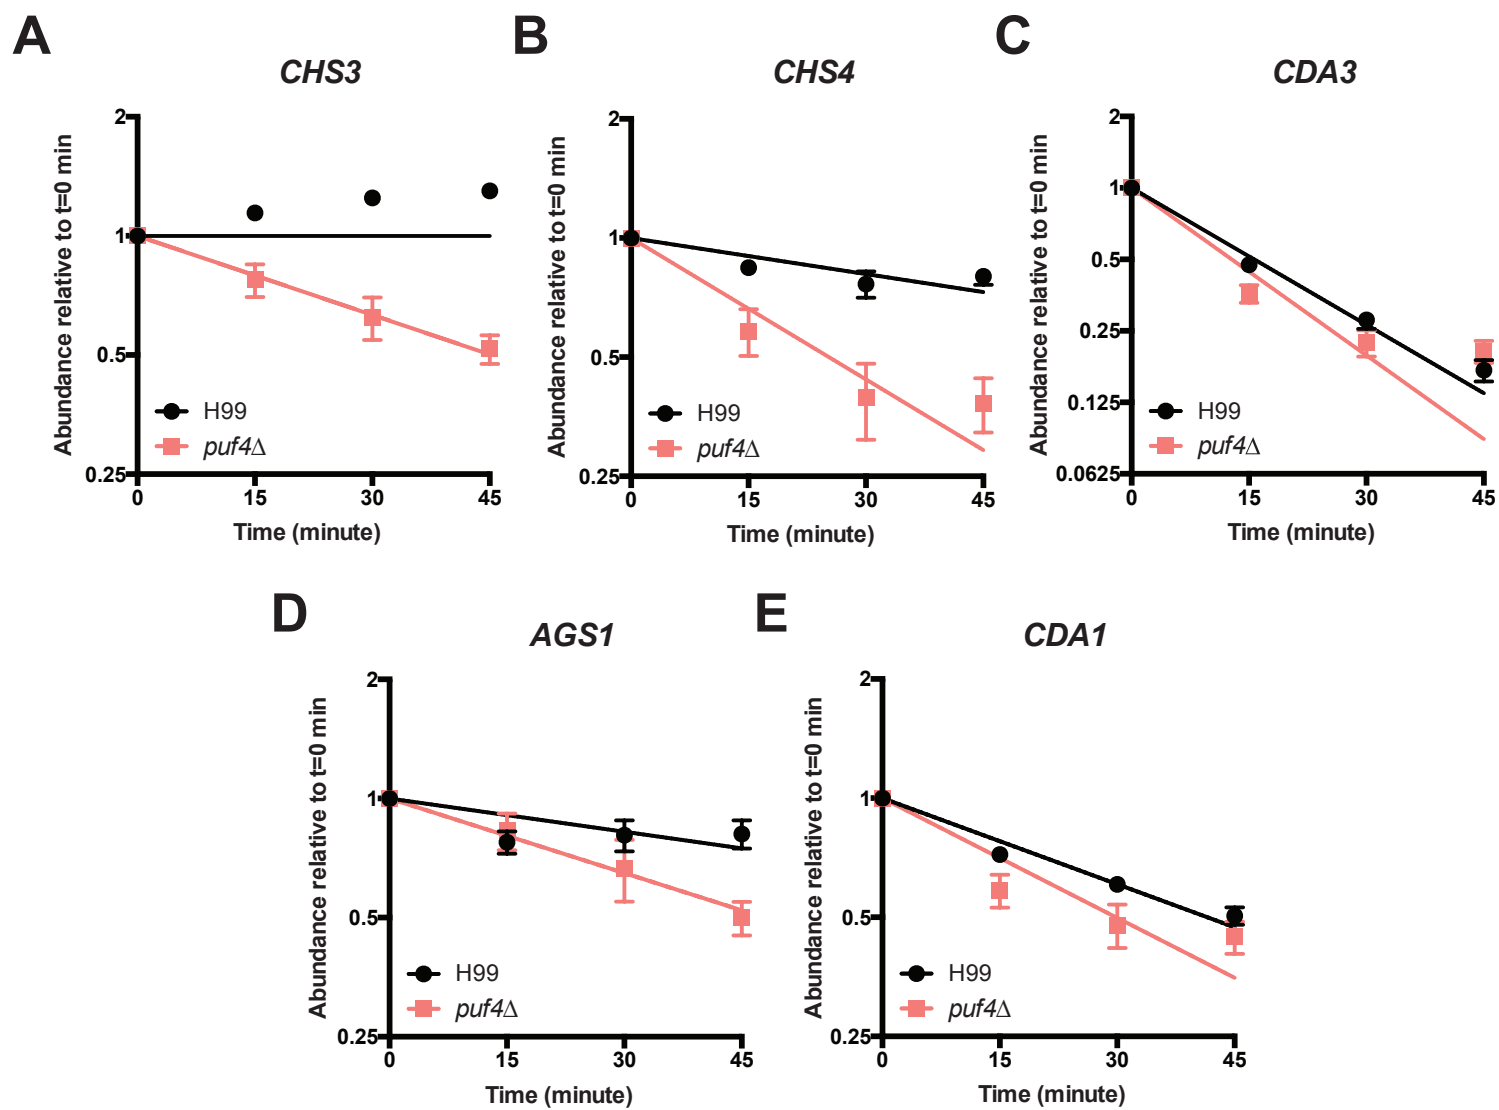

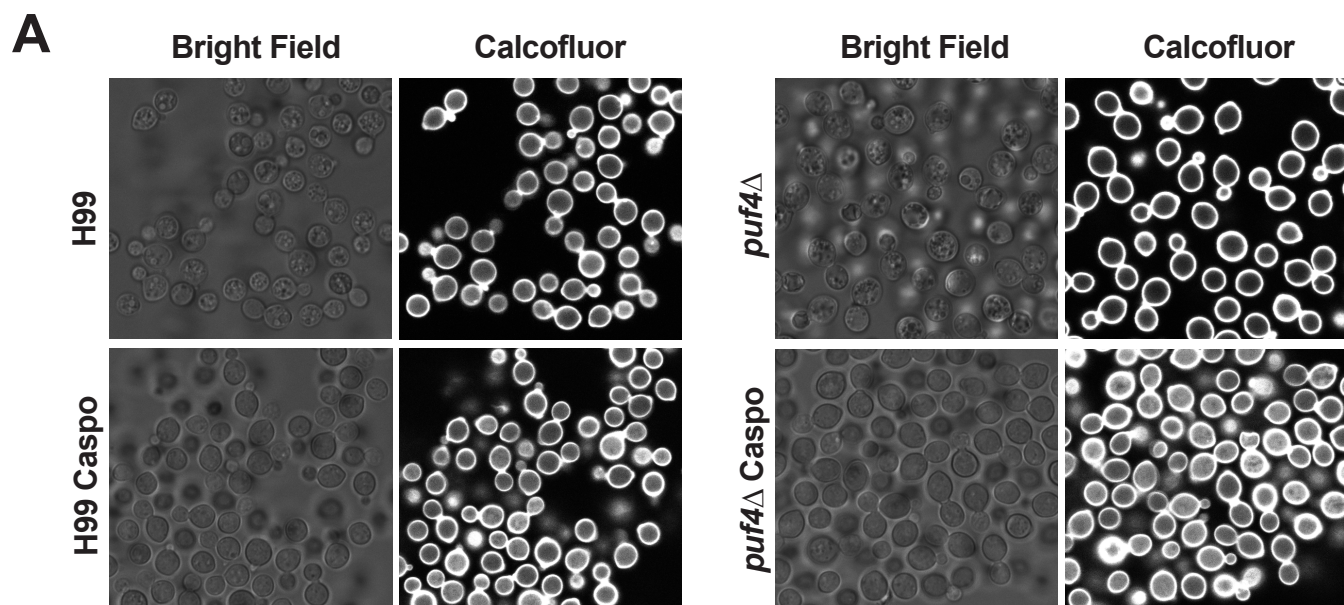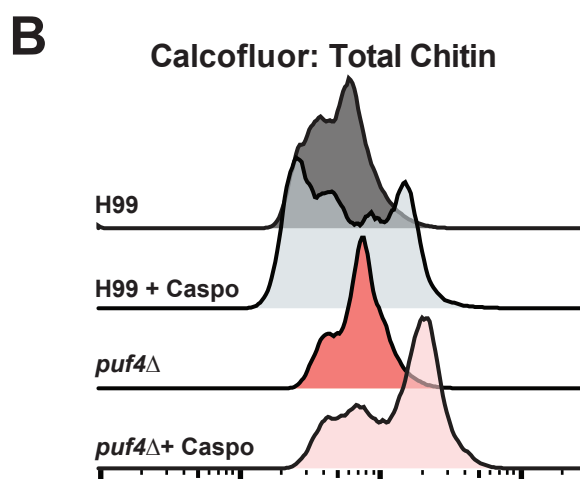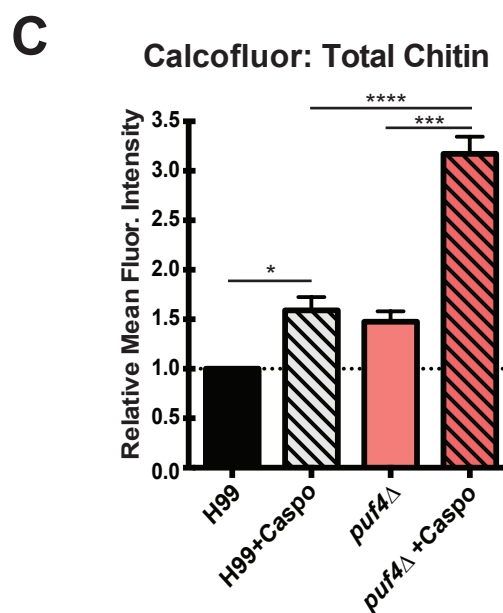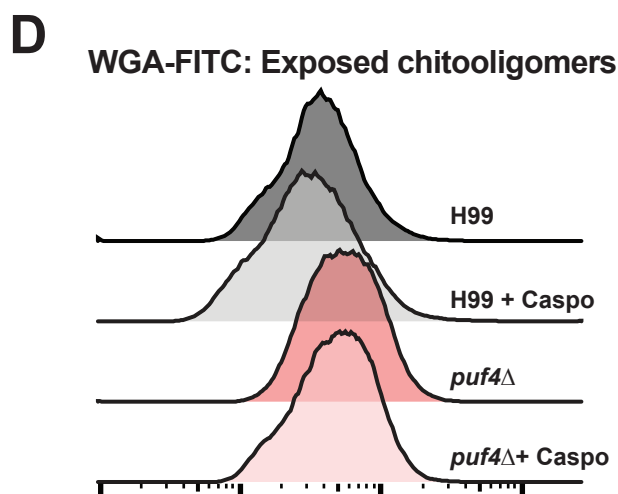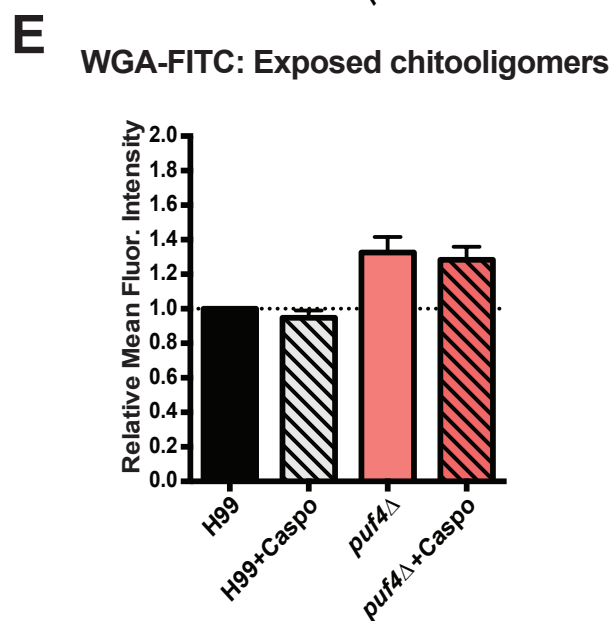

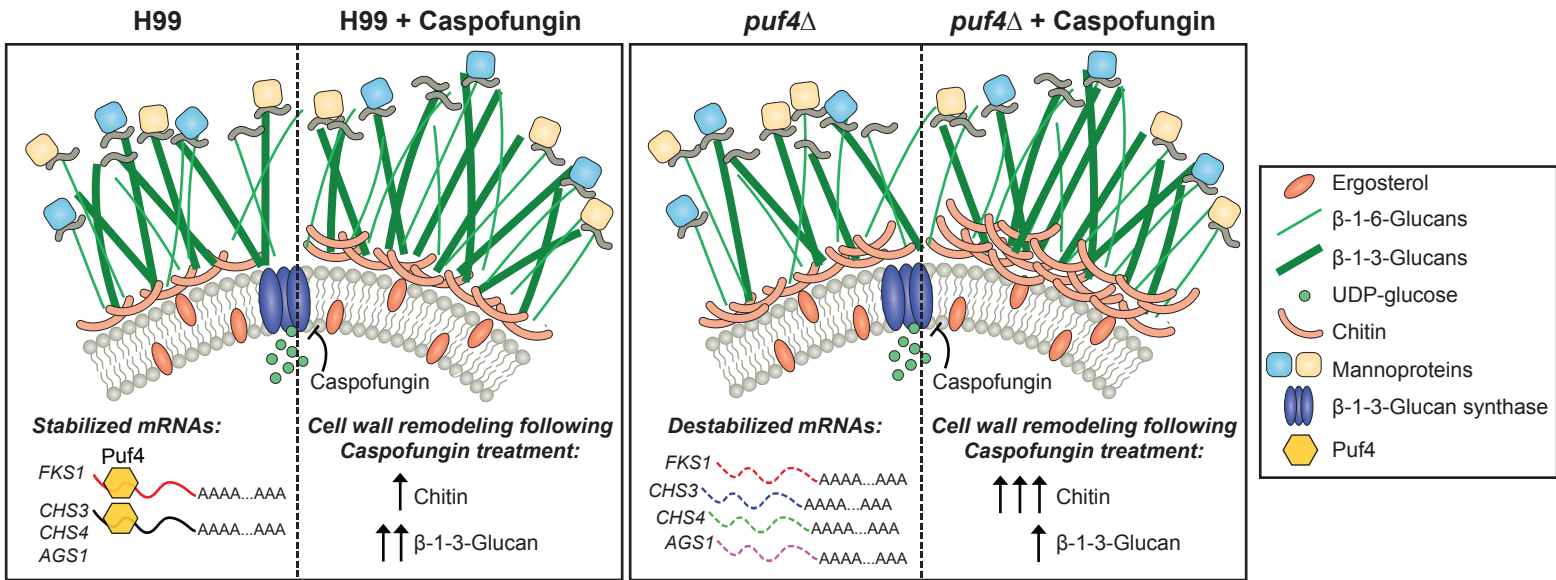

**Table 1.** List of Puf4 binding element containing cell wall biosynthesis related genes. **UGUANNNUA** motif was searched in target genes using FIMO (MEME-suite version 5.1.1.). Results were manually confirmed and location of the motifs were identified.

\* Indicates the genes selected for further mRNA stability analysis.

| <b>Gene</b>         | <b>Gene ID</b> | <b>Start</b> | <b>End</b> | <b>p-value</b> | <b>Location</b> |
|---------------------|----------------|--------------|------------|----------------|-----------------|
| <b><i>CHS3</i>*</b> | CNAG_05581     | 242          | 251        | 0.000262       | 5' UTR          |
| <b><i>CHS4</i>*</b> | CNAG_00546     | 3257         | 3266       | 0.00013        | Exon            |
|                     |                | 3516         | 3525       | 0.000203       | Exon            |
| <b><i>CHS7</i></b>  | CNAG_02217     | 88           | 97         | 6.59E-05       | 5' UTR          |
|                     |                | 3264         | 3273       | 6.59E-05       | Exon            |
| <b><i>CHS8</i></b>  | CNAG_07499     | 1479         | 1488       | 7.96E-05       | Exon            |
| <b><i>CDA3</i>*</b> | CNAG_01239     | 1916         | 1925       | 7.96E-05       | 3' UTR          |
| <b><i>FKS1</i>*</b> | CNAG_06508     | 281          | 290        | 7.96E-05       | 5' UTR          |
|                     |                | 307          | 316        | 0.000162       | 5' UTR          |
|                     |                | 313          | 322        | 0.000162       | 5' UTR          |
| <b><i>SKN1</i></b>  | CNAG_00897     | 2471         | 2480       | 0.000122       | 3' UTR          |
| <b><i>AGS1</i>*</b> | CNAG_03120     | 202          | 211        | 0.000107       | 5' UTR          |



**Table 2.** Primers used in this study

| <b>Cloning</b>            |                                                                                                           |                         |                  |
|---------------------------|-----------------------------------------------------------------------------------------------------------|-------------------------|------------------|
| <b>Name</b>               | <b>Primer Sequence</b>                                                                                    | <b>Restriction site</b> | <b>Reference</b> |
| HYG F                     | GGCTGCGAGGATGTGAGC                                                                                        |                         | This study       |
| HYG R                     | GCCACCAAGCGTTAAGGCC                                                                                       |                         | This study       |
| PUF4 5' Promoter F        | TAATAAGCGGCCGCGCGATGCTGGCAAGGC                                                                            | NotI                    | This study       |
| PUF4 +FLAG R              | TAATAAGTCGACTCATTTATCATCATCATCCTTGAATCCATCATCGGAACGTGGGAAGG                                               | Sall                    | This study       |
| PUF4 Terminator 5' end F  | TAATAAGTCGACTGAAGAGCGGATAAAGTCCG                                                                          | SalI                    | This study       |
| PUF4 Terminator 3' end R  | TAATAAAGATCTGCATGTCGATGAGAATGTCAGG                                                                        | BglII                   | This study       |
| <b>EMSA</b>               |                                                                                                           |                         |                  |
| <b>Name</b>               | <b>Sequence</b>                                                                                           | <b>Reference</b>        |                  |
| FKS1 5' UTR-TYE705        | /5TYE705/rGrArCrGrUrGrUrArGrArGrCrUrArUrCrGrArCrArGrGrArArGrArGrGrUrGrUrArArCrUrGrUrArArCrUrGrUrArGrCrGrU | This study              |                  |
| FKS1 5' UTR -WT-unlabeled | rGrArCrGrUrGrUrArGrArGrCrUrArUrCrGrArCrArGrGrArArGrArGrGrUrGrUrArArCrUrGrUrArArCrUrGrUrArGrCrGrU          | This study              |                  |
| FKS1 5' UTR-MUT-unlabeled | rGrArCrGrArArArGrArGrCrUrArUrCrGrArCrArGrGrArArGrArGrArArArArArArArArArArCrUrGrGrCrGrCrGrU                | This study              |                  |
| <b>RT-q-PCR</b>           |                                                                                                           |                         |                  |
| <b>Gene</b>               | <b>Primer Sequence</b>                                                                                    | <b>Reference</b>        |                  |
| <i>PUF4 F</i>             | AAGACGACGATGTTGATGCG                                                                                      | This study              |                  |
| <i>PUF4 R</i>             | GCACCAGGAACAGCAGAAAA                                                                                      | This study              |                  |
| <i>CHS3 F</i>             | ACCCAGGTCTGGCATTCC                                                                                        | (Esher et. al., 2018)   |                  |
| <i>CHS3 R</i>             | AGGATCAACATTGGAAGC                                                                                        | (Esher et. al., 2018)   |                  |
| <i>CHS4 F</i>             | CGGTCTTCAGGCATTGATTT                                                                                      | (Esher et. al., 2018)   |                  |
| <i>CHS4 R</i>             | TTCCGAGTGAAGTGATGCTG                                                                                      | (Esher et. al., 2018)   |                  |
| <i>CHS6 F</i>             | TTGACCCTTGGCACATCT                                                                                        | (Esher et. al., 2018)   |                  |
| <i>CHS6 R</i>             | GTTGGCATAAGTATCCTT                                                                                        | (Esher et. al., 2018)   |                  |
| <i>CDA1 F</i>             | TCGAGCTATTGCTGCTCAGA                                                                                      | (Esher et. al., 2018)   |                  |
| <i>CDA1 R</i>             | GCTGGTAGATGTCGTGCTCA                                                                                      | (Esher et. al., 2018)   |                  |
| <i>CDA2 F</i>             | GTAACGAGGTCGTCTTTG                                                                                        | (Esher et. al., 2018)   |                  |
| <i>CDA2 R</i>             | TGTAGTTGGTGAGCTCGT                                                                                        | (Esher et. al., 2018)   |                  |
| <i>CDA3 F</i>             | ATGTGGCCGATGCTTTTAAC                                                                                      | (Esher et. al., 2018)   |                  |
| <i>CDA3 R</i>             | GAAGTGAGAAGGCCCTGTTGG                                                                                     | (Esher et. al., 2018)   |                  |
| <i>AGS1 F</i>             | ATCCTTATCCGTTATTCC                                                                                        | (Esher et. al., 2018)   |                  |
| <i>AGS1 R</i>             | AGCTGTTCCCTAGCGAGC                                                                                        | (Esher et. al., 2018)   |                  |
| <i>FKS1 F</i>             | TGGACTGGTGTITGGTTCAA                                                                                      | (Esher et. al., 2018)   |                  |
| <i>FKS1 R</i>             | GTACAAAAGACCGTACTTG                                                                                       | (Esher et. al., 2018)   |                  |
| <i>KRE6 F</i>             | GTCTCGGAAGGCGACTCAT                                                                                       | (Esher et. al., 2018)   |                  |
| <i>KRE6 R</i>             | TCAACTATTCTTTGGGAAGG                                                                                      | (Esher et. al., 2018)   |                  |
| <i>SKN 1 F</i>            | CTGGACAATGTATGCGGATG                                                                                      | (Esher et. al., 2018)   |                  |
| <i>SKN 1 R</i>            | TCCGCACTGGGATAATCTTC                                                                                      | (Esher et. al., 2018)   |                  |
| <i>GPD1 F</i>             | AGTATGACTCCACACATGGTCCG                                                                                   | (Esher et. al., 2018)   |                  |
| <i>GPD1 R</i>             | AGACAAACATCGGAGCATCAGC                                                                                    | (Esher et. al., 2018)   |                  |
